# Supplementary material
Source: PubMed Central journal article supplement (PMC5573163)
Supplement: NIHMS887151-supplement-Supplemental_Material.pdf [file NIHMS887151-supplement-Supplemental_Material.pdf]

**Supplementary Table 1. PubMed IDs for sex effects on outcome risk reported in Figure 2**

| <b>Index Condition – Outcome Pair</b> | <b>First Author</b>      | <b>Publication Year</b> | <b>PubMed ID</b> |
|---------------------------------------|--------------------------|-------------------------|------------------|
| <b>CHF – Mortality</b>                | Bouvy <sup>1</sup>       | 2003                    | 12748212         |
|                                       | Adlam <sup>2</sup>       | 2005                    | 15769783         |
|                                       | Alehagen <sup>3</sup>    | 2005                    | 15820281         |
|                                       | Pocock <sup>4</sup>      | 2006                    | 16219658         |
|                                       | Levy <sup>5</sup>        | 2006                    | 16534009         |
|                                       | Rassi <sup>6</sup>       | 2006                    | 16928995         |
|                                       | Miura <sup>7</sup>       | 2008                    | 18296827         |
|                                       | O'Connor <sup>8</sup>    | 2012                    | 22114101         |
| <b>Revascularization – Mortality</b>  | Hannan <sup>9</sup>      | 1992                    | 1433740          |
|                                       | O'Connor <sup>10</sup>   | 1992                    | 1591830          |
|                                       | Wong <sup>11</sup>       | 1999                    | 10519495         |
|                                       | Moscucci <sup>12</sup>   | 2001                    | 11457742         |
|                                       | Zaroff <sup>13</sup>     | 2002                    | 12088769         |
|                                       | Wu <sup>14</sup>         | 2004                    | 14752428         |
|                                       | Wu <sup>15</sup>         | 2006                    | 16458151         |
|                                       | Hannan <sup>16</sup>     | 2006                    | 16458152         |
|                                       | Mehta <sup>17</sup>      | 2008                    | 18250266         |
|                                       | de Mulder <sup>18</sup>  | 2011                    | 21345854         |
|                                       | Hamburger <sup>19</sup>  | 2009                    | 19681116         |
| <b>ACS – Mortality</b>                | Grzybowski <sup>20</sup> | 2000                    | 11265730         |
|                                       | Zaroff <sup>13</sup>     | 2002                    | 12088769         |
|                                       | Williams <sup>21</sup>   | 2006                    | 16498154         |
|                                       | de Boer <sup>22</sup>    | 2011                    | 21392604         |
|                                       | Boersma <sup>23</sup>    | 2000                    | 10840005         |
|                                       | Mehran <sup>24</sup>     | 2010                    | 20513595         |
|                                       | Roe <sup>25</sup>        | 2011                    | 22093204         |

**Supplementary Table 2.** Study- and model-level characteristics of CVD-related clinical prediction models including sex effects

| PubMed ID              | First Author             | Pub. Year | Inclusion of Sex | Effect of Female Sex | Population                                                                                                                                                                                                                                                 | Outcome(s)            | Covariates                                                                                                                                       | Cohort Sample Size | % Female in Cohort | No. of Events | Mean Age (SD) | Follow-Up Duration     |
|------------------------|--------------------------|-----------|------------------|----------------------|------------------------------------------------------------------------------------------------------------------------------------------------------------------------------------------------------------------------------------------------------------|-----------------------|--------------------------------------------------------------------------------------------------------------------------------------------------|--------------------|--------------------|---------------|---------------|------------------------|
| <b>CAD – MORTALITY</b> |                          |           |                  |                      |                                                                                                                                                                                                                                                            |                       |                                                                                                                                                  |                    |                    |               |               |                        |
| 1433740                | Hannan <sup>9</sup>      | 1992      | Covariate        | Harmful              | Patients undergoing percutaneous transluminal coronary angioplasty                                                                                                                                                                                         | In-hospital mortality | Shock, Hemodynamic myocardial infarction c instability, Sex, LVEF                                                                                | 5827               | 29.6%              | 37            | NR            | Hospitalization period |
| 1591830                | O'Connor <sup>10</sup>   | 1992      | Covariate        | Harmful              | Patients undergoing isolated coronary artery bypass grafting                                                                                                                                                                                               | In-hospital mortality | Prior CABG, Priority at Surgery, Comorbidities, Sex, Left Ventricular End Diastolic Pressure, Ejection Fraction Score, Age, Bovine Serum Albumin | 3055               | NR                 | 132           | NR            | Hospitalization period |
| 10519495               | Wong <sup>11</sup>       | 1999      | Covariate        | Harmful              | Patients undergoing CABG surgery who received fast-track cardiac anesthesia (FTCA) technique, consisting of low-dose fentanyl (10-15 mg/kg) and propofol infusion                                                                                          | Mortality             | Left Ventricle Grade 4, Emergency Surgery, Sex                                                                                                   | 885                | 24%                | 23            | 60.8 (11.3)   | 30 days                |
| 10840005               | Boersma <sup>23</sup>    | 2000      | Covariate        | Protective           | Patients presenting within 24 hours of an episode of ischemic chest pain (>10 min) either transient ST-segment elevation (>0.5 mm), transient or persistent ST-segment depression (>0.5 mm), T-wave inversion (>1.0 mm), or elevation of creatinine kinase | Mortality             | Age, Signs of Heart Failure (Rales), ST-Depression on EKG, HR, SBP, CCS Class, Sex                                                               | 9461               | 35%                | 342           | 64 (NR)       | 30 days                |
| 11265730               | Grzybowski <sup>20</sup> | 2000      | Covariate        | Harmful              | Patients with suspected AMI transported by emergency medical services                                                                                                                                                                                      | Mortality             | Age, Respiratory Rate, SBP, Sex                                                                                                                  | 244                | 39.8%              | 36            | 66.6 (14.8)   | 7 days                 |
| 11457742               | Moscucci <sup>12</sup>   | 2001      | Covariate        | Harmful              | Patients undergoing percutaneous coronary interventions                                                                                                                                                                                                    | In-hospital mortality | Shock, Creatinine, Cardiac Arrest, MI, Age, Sex, Thrombus, LVEF, PVD, Number of Diseased Vessels                                                 | 10729              | 31.8%              | 168           | 62.6 (11.9)   | Hospitalization period |

|          |                          |      |            |            |                                                                                                                                                     |                        |                                                                                                                                                                                                              |       |       |                  |            |                           |
|----------|--------------------------|------|------------|------------|-----------------------------------------------------------------------------------------------------------------------------------------------------|------------------------|--------------------------------------------------------------------------------------------------------------------------------------------------------------------------------------------------------------|-------|-------|------------------|------------|---------------------------|
| 11686666 | Marchioli <sup>26</sup>  | 2001 | Stratified | NA         | Recent MI and without unfavorable short-term prognosis                                                                                              | Mortality              | Age, Left Ventricular Dysfunction, Leukocytes, Claudication, Cholesterol, Fibrinogen, Smoking, HR, Electrical Instability, Diabetes, Arterial HTN, Residual Myocardial Ischemia                              | 11248 | 14.6% | M: 904<br>F: 167 | 59 (11)    | 4 years                   |
| 12088769 | Zaroff <sup>13</sup>     | 2002 | Covariate  | Harmful    | Patients with acute MI who underwent CABG                                                                                                           | In-hospital mortality  | Killip Class, Age, Previous CABG, Q-wave vs. non-Q-wave Acute MI, Sex, CHF, Diabetes, Weight, Previous Acute MI                                                                                              | 71774 | 29.6% | 3948             | NR         | Hospitalization period    |
| 14752428 | Wu <sup>14</sup>         | 2004 | Covariate  | Harmful    | Patients undergoing coronary artery bypass grafting (CABG)                                                                                          | Operative mortality    | Previous Cardiac Surgery, Renal Insufficiency, Chronic Lung Disease, Urgency, LVEF, Cerebrovascular Disease, History of PVD, Age, Canadian Cardiovascular Society Class, Sex, Left Main Stenosis, NYHA Class | 11063 | 24%   | 255              | 65 (11)    | Hospitalization period    |
| 15135693 | Elhendy <sup>27</sup>    | 2004 | Covariate  | Protective | Patients with known or suspected CAD                                                                                                                | All-cause mortality    | Exercise Wall Motion Score Index, Age, Sex, Metabolic Equivalents                                                                                                                                            | 2840  | 42%   | 151              | 62 (12)    | 4 years (median: 3 years) |
| 16098306 | Cortigiani <sup>28</sup> | 2005 | Covariate  | Protective | Patients with known or suspected coronary artery disease who underwent dipyridamole stress echocardiography                                         | All-cause mortality    | Age, Peak Wall Motion Score Index, Diabetes, Sex                                                                                                                                                             | 3969  | 32%   | 324              | 60 (NR)    | median: 48 months         |
| 16210253 | Clayton <sup>29</sup>    | 2005 | Covariate  | Protective | Patients with stable symptomatic angina requiring treatment, preserved left ventricular function, and either previous MI or proved angiographic CAD | Mortality              | Diabetes, Age, Smoking, QT Interval, Lipid Lowering Therapy, Angina, LVEF, Sex, SBP, Previous Angiography, Previous MI, Glucose, Angina Medication, Creatinine, WBC                                          | 7311  | 20.6% | 569              | 63.5 (9.2) | mean: 4.9 years           |
| 16427855 | Rexius <sup>30</sup>     | 2006 | Covariate  | Protective | Patients accepted for elective coronary artery bypass grafting (CABG) awaiting surgery                                                              | Pre-surgical mortality | UA, Left Main Stenosis, LVEF, Perioperative Risk, Aortic Valve Disease Requiring Surgery, Sex                                                                                                                | 5167  | 24%   | 42               | 66 (9)     | median: 47 days           |
| 16458151 | Wu <sup>15</sup>         | 2006 | Covariate  | Harmful    | Patients in population-based percutaneous coronary intervention (PCI) registry                                                                      | In-hospital mortality  | Hemodyn Acute MI C Static, MI with Stent Thrombosis, Renal Failure, CHF, LVEF, Peripheral Arterial                                                                                                           | 46090 | 32.1% | 321              | NR         | Hospitalization period    |

|          |                        |      |           |            |                                                                              |                                      |                                                                                                                                                                                                                        |        |       |       |             |                           |
|----------|------------------------|------|-----------|------------|------------------------------------------------------------------------------|--------------------------------------|------------------------------------------------------------------------------------------------------------------------------------------------------------------------------------------------------------------------|--------|-------|-------|-------------|---------------------------|
|          |                        |      |           |            |                                                                              |                                      | Disease, Sex, Age                                                                                                                                                                                                      |        |       |       |             |                           |
| 16458152 | Hannan <sup>16</sup>   | 2006 | Covariate | Harmful    | Patients who underwent isolated CABG surgery                                 | In-hospital mortality                | MI, Hemodynamically unstable, Renal Failure, LVEF, Previous Open Heart Operations, Sex, Extensively Calcified Ascending Aorta, Peripheral Arterial Disease, COPD, Age                                                  | 16120  | NR    | 366   | NR          | Hospitalization period    |
| 16498154 | Williams <sup>21</sup> | 2006 | Covariate | Harmful    | Patients with acute MI                                                       | Mortality                            | Killip Class, ST Depression, SBP, Sex, Age, Creatinine, QRS Duration, MI Location                                                                                                                                      | 809    | 60%   | 87    | 70.7 (NR)   | 30 days                   |
| 17223413 | Anderson <sup>31</sup> | 2007 | Covariate | Protective | Patients who underwent coronary angiography                                  | All-cause mortality                  | WBC, Age, Hematocrit, MCV, Red Cell Distribution, MCH, Platelet Count, Sex                                                                                                                                             | 17787  | 38%   | 709   | 61.1 (14.7) | 30 days (mean: 4.9 years) |
| 17223413 | Anderson <sup>31</sup> | 2007 | Covariate | Protective | Patients who underwent coronary angiography                                  | All-cause mortality                  | Age, Red Cell Distribution, MCH, Hematocrit, WBC, Platelet Count, MCV, Sex                                                                                                                                             | 17787  | 38%   | 709   | 61.1 (14.7) | 30 days (mean: 4.9 years) |
| 17499864 | Yap <sup>32</sup>      | 2008 | Covariate | Protective | Patients with recent documented acute MI with at least one high-risk feature | All-cause mortality                  | Age, Diabetes, HR, HTN, NYHA Class, Non-Q Wave Infarct on EKG, Previous MI or Angina, Sex, SBP                                                                                                                         | 2707   | 21%   | 480   | NR          | 2 years                   |
| 17499864 | Yap <sup>32</sup>      | 2008 | Covariate | Protective | Patients with recent documented acute MI with at least one high-risk feature | Arrhythmic cardiac mortality         | Age, Diabetes, HR, HTN, NYHA Class, Non-Q Wave Infarct on EKG, Previous MI or Angina, Sex, SBP                                                                                                                         | 2707   | 21%   | 480   | NR          | 2 years                   |
| 17499864 | Yap <sup>32</sup>      | 2008 | Covariate | Protective | Patients with recent documented acute MI with at least one high-risk feature | Non-arrhythmic cardiac mortality     | Age, Diabetes, HR, HTN, NYHA Class, Non-Q Wave Infarct on EKG, Previous MI or Angina, Sex, SBP                                                                                                                         | 2707   | 21%   | 480   | NR          | 2 years                   |
| 17550750 | Singh <sup>33</sup>    | 2007 | Covariate | Harmful    | Patients undergoing PCI                                                      | Mortality                            | Age, LVEF, Creatinine, Shock, MI, CHF, Peripheral Artery Disease, Diabetes, Sex                                                                                                                                        | 7457   | 31%   | 136   | 66.9 (12.1) | Hospitalization period    |
| 18250266 | Mehta <sup>17</sup>    | 2008 | Covariate | Harmful    | Patients with and without cardiogenic shock undergoing CABG                  | Post-operative in-hospital mortality | CABG and Ventricular Septal Repair, Creatinine, Operative Status, Prior Cardiac Surgery, CABG and Aortic Valve, CABG and Mitral Valve, Immunosuppressive Therapy, Sex, LVEF, IABP, Preoperative Resuscitation, MI, Age | 708593 | 28.9% | 24092 | NR          | Hospitalization period    |
| 19559824 | Shahian <sup>34</sup>  | 2009 | Covariate | Harmful    | Patients who underwent single aortic or mitral valve surgical                | Mortality                            | BSA, Dialysis, Priority Status, Reoperation, Endocarditis, Shock,                                                                                                                                                      | 101661 | 35.5% | 6919  | NR          | 30 days                   |

|          |                         |      |           |            |                                                                                                       |                       |                                                                                                                                                                                                                                                                                                                 |       |       |      |             |                        |
|----------|-------------------------|------|-----------|------------|-------------------------------------------------------------------------------------------------------|-----------------------|-----------------------------------------------------------------------------------------------------------------------------------------------------------------------------------------------------------------------------------------------------------------------------------------------------------------|-------|-------|------|-------------|------------------------|
|          |                         |      |           |            | procedures combined with coronary artery bypass grafting                                              |                       | Sex x BSA, MI, Creatinine, CHF and NYHA IV, IABP or Inotropes, Sex, Immunosuppressive Treatment, Diabetes, PVD, Tricuspid Insufficiency, CHF without NYHA IV, CVD and Prior CVA, AF, CLD Function, MVR, Number of Diseased Vessels, Left Main Disease, UA, Mitral Stenosis, Age, HTN, Race, Mitral Valve Repair |       |       |      |             |                        |
| 19681116 | Hamburger <sup>19</sup> | 2009 | Covariate | Protective | Population-based registry of patients who underwent PCI in British Columbia                           | 30-day mortality      | STEMI, Critical Preprocedural State, LVEF, ACS, Left Main Disease, Emergency, NYHA Class, Dialysis or Creatinine, Triple-Vessel Disease, Age, Sex                                                                                                                                                               | 26350 | 26.8% | 500  | 64.3 (11.5) | 30 days                |
| 20513595 | Mehran <sup>24</sup>    | 2010 | Covariate | Protective | Patients with ACS including NSTEMI, STEMI, and biomarker negative ACS                                 | Mortality             | Diabetes, Biomarkers, Smoking, Age, STEMI, Previous MI, WBC, Creatinine, Sex, UFH/Enox + GPI, Glycoprotein Inhibitor, Bivalirudin, Hemoglobin                                                                                                                                                                   | 17421 | 28.7% | 660  | 62.1 (11.7) | 1 year                 |
| 20923988 | Singh <sup>35</sup>     | 2010 | Covariate | Protective | Patients who underwent PCI                                                                            | All-cause mortality   | Age, BMI, CAD Comorbidity Index, LVEF, History of CHF, MEDS, Troponin T, Ventricular Arrhythmia, Prior MI, Smoking Status, Cardiogenic Shock, Prior CABG, Sex, Stable Angina, Procedural Failure, Prior PCI, Three-Vessel Disease, UA, Stent Use, Glycoprotein Use, Cholesterol                                 | 9165  | 29%   | 1243 | 66.8 (12.2) | Hospitalization period |
| 21345854 | De Mulder <sup>18</sup> | 2011 | Covariate | Harmful    | Patients in the Euro Heart Registry who underwent percutaneous intervention for different indications | In-hospital mortality | Hemodynamic Instability, Indication for PCI, Age, Left Main Disease, Diabetes, BMI, Prior Stroke, Valve Disease, Bifurcation Lesion, Sex, Proximal Left Anterior Descending                                                                                                                                     | 23032 | 26%   | 339  | 64 (NR)     | Hospitalization period |

|                        |                       |      |           |            |                                                                                                               |                          |                                                                                                                                                                                                                                                                            |       |       |      |             |                           |
|------------------------|-----------------------|------|-----------|------------|---------------------------------------------------------------------------------------------------------------|--------------------------|----------------------------------------------------------------------------------------------------------------------------------------------------------------------------------------------------------------------------------------------------------------------------|-------|-------|------|-------------|---------------------------|
|                        |                       |      |           |            |                                                                                                               |                          | Diseased, TIMI, Type-C Lesion, Smoking, Number of Diseased Vessels, Prior CABG                                                                                                                                                                                             |       |       |      |             |                           |
| 21392604               | de Boer <sup>22</sup> | 2011 | Covariate | Harmful    | Patients who participated in 22 randomized clinical trials of PCI vs. fibrinolysis                            | All-cause mortality      | Age, HR, SBP, Anterior Infarct Location, Prior MI, Time to Treatment, Diabetes, Sex                                                                                                                                                                                        | 5421  | 24.4% | 363  | NR          | 30 days                   |
| 22093204               | Roe <sup>25</sup>     | 2011 | Covariate | Protective | NSTEMI                                                                                                        | Long-term mortality      | Signs of Heart Failure on Presentation, Prior Heart Failure, Prior Stroke, Age, Diabetes, Race, Sex, Prior PAD, Smoking, Hematocrit, Creatinine, Prior MI, HR, SBP, Weight, EKG Changes, Prior CABG, Troponin Ratio, HTN, Prior PCI, Family History of CAD, Hyperlipidemia | 33640 | 47.7% | NR   | NR          | median: 453 days          |
| <b>CHF – MORTALITY</b> |                       |      |           |            |                                                                                                               |                          |                                                                                                                                                                                                                                                                            |       |       |      |             |                           |
| 12748212               | Bouvy <sup>1</sup>    | 2003 | Covariate | Protective | Admission due to heart failure                                                                                | Mortality                | History of Renal Insufficiency, Beta Blockers, Ankle Edema, History of Diabetes, BP, Sex, Age, Weight                                                                                                                                                                      | 152   | 34.2% | 51   | 69.7 (NR)   | 18 months                 |
| 15769783               | Adlam <sup>2</sup>    | 2005 | Covariate | Protective | Primary care population prescribed loop diuretics for CHF                                                     | All-cause mortality      | Age, BNP, CVA, Diabetes, EKG, Sex                                                                                                                                                                                                                                          | 528   | 59%   | 190  | 75 (10)     | 5 years (mean: 6.4 years) |
| 15820281               | Alehagen <sup>3</sup> | 2005 | Covariate | Protective | Patients who attended primary care because of symptoms and/or signs that might be attributed to heart failure | Cardiovascular mortality | NYHA Class, Age, Sex, Diabetes                                                                                                                                                                                                                                             | 510   | 47.8% | 71   | 73 (6)      | 6 years                   |
| 16219658               | Pocock <sup>4</sup>   | 2006 | Covariate | Protective | Patients with CHF                                                                                             | All-cause mortality      | Diabetes, Age, NYHA Class, Prior Heart Failure Hospitalization, Pulmonary Edema, Smoking, CHF, Cardiomegaly, Bundle Branch Block, Previous MI, Dependent Edema, Pulmonary Crackles, Mitral Regurgitation, LVEF, Dyspnea, AF, DBP, HR, BMI, Candesartan vs. Placebo, Sex    | 7599  | 68.4% | 1831 | 65.5 (10.9) | median: 3.17 years        |
| 16534009               | Levy <sup>5</sup>     | 2006 | Covariate | Protective | Patients with heart failure (ejection fraction < 30% and NYHA functional class IIIB to IV)                    | Mortality                | Cholesterol, NYHA Class, Allopurinol Use, Ischemic Etiology, Hemoglobin, Diuretic Dose, Age, Sex, Uric                                                                                                                                                                     | 1125  | 24%   | 395  | 65 (11)     | 1 year                    |

|                        |                       |      |           |            |                                                                                                                                                                   |                                                                                      |                                                                                                           |      |       |     |             |                            |
|------------------------|-----------------------|------|-----------|------------|-------------------------------------------------------------------------------------------------------------------------------------------------------------------|--------------------------------------------------------------------------------------|-----------------------------------------------------------------------------------------------------------|------|-------|-----|-------------|----------------------------|
|                        |                       |      |           |            |                                                                                                                                                                   |                                                                                      | Acid, Sodium, LVEF, Lymphocytes, SBP, Statin Use                                                          |      |       |     |             |                            |
| 16928995               | Rassi <sup>6</sup>    | 2006 | Covariate | Protective | Patients with Chagas heart disease                                                                                                                                | Mortality                                                                            | NYHA Class, Cardiomegaly, Wall Motion Abnormality, Nonsustained VT, Low QRS Voltage, Sex                  | 424  | 41.7% | 130 | 47 (11)     | 10 years (mean: 7.9 years) |
| 18296827               | Miura <sup>7</sup>    | 2008 | Covariate | Protective | Patients with idiopathic dilated cardiomyopathy (IDC)                                                                                                             | All-cause mortality                                                                  | Sex, Left Ventricular Diameter Index, Age, NYHA Class, LVEF                                               | 1554 | 27.4% | 420 | NR          | 5 years                    |
| 22114101               | O'Connor <sup>8</sup> | 2012 | Covariate | Protective | Patients enrolled in the HF-ACTION study with a NYHF class II-IV, LVEF < 35%                                                                                      | All-cause mortality                                                                  | Serum Urea Nitrogen, Exercise Duration on CPX Test, BMI, Sex                                              | 387  | 28%   | 387 | 59 (NR)     | median: 2.5 years          |
| <b>CAD – MORBIDITY</b> |                       |      |           |            |                                                                                                                                                                   |                                                                                      |                                                                                                           |      |       |     |             |                            |
| 1739359                | Hubbard <sup>36</sup> | 1992 | Covariate | Protective | Patients with symptomatic CAD who underwent exercise equilibrium radionuclide angiography and coronary angiography within 6 months                                | Three vessel or left main CAD                                                        | Previous MI, Sex, Diabetes, Angina, Age                                                                   | 680  | 27.6% | 215 | 58.6 (NR)   | NA (case control)          |
| 9217616                | Morise <sup>37</sup>  | 1997 | Covariate | Protective | Patients with suspected CAD and normal resting EKGs who presented for exercise testing                                                                            | Severe CAD (presence of $\geq 2$ vessel with $\geq 70\%$ luminal diameter narrowing) | Family History, Hyperlipidemia, Obesity, HTN, Smoking, BMI, Diabetes, Symptoms, Estrogen Status, Age, Sex | 915  | 48%   | 170 | 54 (1)      | Diagnosis                  |
| 9313022                | Selker <sup>38</sup>  | 1997 | Covariate | Protective | Patients who had acute MI and ST-segment elevation on EKG                                                                                                         | Thrombolysis-Related Major Bleed Component                                           | Sex, Age, History of HTN, HR with SBP, Thrombolytic Agents, SBP                                           | 2525 | NR    | NR  | NR          | 30 days                    |
| 10519495               | Wong <sup>11</sup>    | 1999 | Covariate | Harmful    | Patients undergoing CABG surgery who received fast-track cardiac anesthesia (FTCA) technique, consisting of low-dose fentanyl (10-15 mg/kg) and propofol infusion | Delayed extubation (defined a priori as extubation time > 10 hours)                  | Postoperative Excess Bleeding, IABP, Age, Sex, Atrial Arrhythmia, Inotropes                               | 885  | 24%   | 221 | 60.8 (11.3) | 10 hours (median: 7 hours) |
| 10519495               | Wong <sup>11</sup>    | 1999 | Covariate | Harmful    | Patients undergoing CABG surgery who received fast-track cardiac anesthesia (FTCA) technique, consisting of low-dose fentanyl (10-15 mg/kg) and propofol infusion | Prolonged ICU length of stay (defined as stays > 48 hours)                           | IABP, Renal Insufficiency, Age, Atrial Arrhythmia, Inotropes, Sex, MI, Postoperative Excessive Bleeding   | 885  | 24%   | 221 | 60.8 (11.3) | 48 hours (mean: 1 day)     |
| 12473877               | West <sup>39</sup>    | 2002 | Covariate | Protective | Patients in the LIPID study with previous ACS and baseline total cholesterol of 4-7 mmol/l                                                                        | Non-hemorrhagic stroke                                                               | Age, AF, Stroke at Baseline, History of Diabetes, SBP, Smoking, BMI, Sex,                                 | 9014 | 16.8% | 388 | NR          | mean: 6 years              |

|          |                            |      |           |            |                                                                                                                                                     |                                                                                                                                                                                                                              |                                                                                                                                                                                                                                                                                                                                                          |        |       |       |             |                        |
|----------|----------------------------|------|-----------|------------|-----------------------------------------------------------------------------------------------------------------------------------------------------|------------------------------------------------------------------------------------------------------------------------------------------------------------------------------------------------------------------------------|----------------------------------------------------------------------------------------------------------------------------------------------------------------------------------------------------------------------------------------------------------------------------------------------------------------------------------------------------------|--------|-------|-------|-------------|------------------------|
|          |                            |      |           |            | (randomly assigned to receive either 40 mg of pravastatin or placebo)                                                                               |                                                                                                                                                                                                                              | History of HTN, Creatinine Clearance, HDL Cholesterol, Triglycerides, Anterior MI, Total Cholesterol, UA, Pravastatin                                                                                                                                                                                                                                    |        |       |       |             |                        |
| 12902080 | Charlesworth <sup>40</sup> | 2003 | Covariate | Harmful    | Patients undergoing isolated CABG surgery with or without extracorporeal circulation                                                                | Perioperative stroke (a new focal neurologic deficit that appears and is still at least partially evident more than 24 hours after its onset, occurring during or after the CABG procedure and established before discharge) | Age, Emergency Priority, Vascular Disease, Renal Failure or Creatinine, Diabetes, LVEF < 40%, Urgent Priority, Sex                                                                                                                                                                                                                                       | 33062  | 28.3% | 532   | NR          | Hospitalization period |
| 15312862 | Sadanandan <sup>41</sup>   | 2004 | Covariate | Protective | Patients with UA and NSTEMI                                                                                                                         | In-hospital CABG                                                                                                                                                                                                             | Troponin, Prior Angina, ST-Segment Deviation, History of PAD, Sex, History of CABG                                                                                                                                                                                                                                                                       | 2219   | 34.4% | 362   | 61.3 (11.7) | Hospitalization period |
| 16159846 | Fowler <sup>42</sup>       | 2005 | Covariate | Harmful    | Patients in the Society of Thoracic Surgeons National Cardiac Database who had CABG (isolated or in combination)                                    | Major infection (mediastinitis, thoracotomy or vein harvest site infection, or septicemia)                                                                                                                                   | BMI, Dialysis, Shock, Age, Other Procedures, Immunosuppressive Therapy, Valve Surgery, Renal Failure, Diabetes, Chronic Lung Disease, CHF, Other Cardiac Surgery, PVD, LVEF, Previous CABG, NYHA Class, Previous MI, Anticoagulants, CVA, Smoking, Valvular Insufficiency, HTN, Cerebrovascular Disease, Race, Sex, Hypercholesterolemia, Cardiac Device | 165715 | NR    | 11633 | NR          | Hospitalization period |
| 16210253 | Clayton <sup>29</sup>      | 2005 | Covariate | Protective | Patients with stable symptomatic angina requiring treatment, preserved left ventricular function, and either previous MI or proved angiographic CAD | MI                                                                                                                                                                                                                           | Diabetes, Previous Angiography, Previous Stroke, Age, Smoking, Sex, Angina, Angina Medication, Previous MI, LVEF, Lipid Lowering Therapy, SBP, QT Interval, Creatinine, Glucose, WBC                                                                                                                                                                     | 7311   | 20.6% | 495   | 63.5 (9.2)  | mean: 4.9 years        |
| 16210253 | Clayton <sup>29</sup>      | 2005 | Covariate | Protective | Patients with stable symptomatic angina requiring treatment, preserved left ventricular function, and either previous MI or proved                  | Stroke                                                                                                                                                                                                                       | Previous Stroke, Smoking, Diabetes, Age, SBP, QT Interval, LVEF, Angina Medication, Angina, Previous Angiography,                                                                                                                                                                                                                                        | 7311   | 20.6% | 495   | 63.5 (9.2)  | mean: 4.9 years        |



|                                      |                         |      |           |            |                                                                                                                                                     |                                                                        |                                                                                                                                                                                                                                                                   |        |       |       |             |                        |
|--------------------------------------|-------------------------|------|-----------|------------|-----------------------------------------------------------------------------------------------------------------------------------------------------|------------------------------------------------------------------------|-------------------------------------------------------------------------------------------------------------------------------------------------------------------------------------------------------------------------------------------------------------------|--------|-------|-------|-------------|------------------------|
|                                      |                         |      |           |            | angiographic CAD                                                                                                                                    |                                                                        | Lipid Lowering Therapy, Glucose, Creatinine, Previous MI, WBC, Sex                                                                                                                                                                                                |        |       |       |             |                        |
| 19243970                             | Antunes <sup>43</sup>   | 2009 | Covariate | Harmful    | Patients undergoing CABG                                                                                                                            | In-hospital CVA                                                        | Cerebrovascular Disease, PVD, Left Ventricular Dysfunction, Non- Elective Surgery, Sex, Age                                                                                                                                                                       | 4567   | 11.8% | 114   | 60.7 (9.3)  | Hospitalization period |
| 19332461                             | Subherwal <sup>44</sup> | 2009 | Covariate | Harmful    | High-risk patients with non-ST-elevation acute coronary syndromes                                                                                   | In-hospital major bleed                                                | Hematocrit, Sex, SBP, CHF, PVD, Diabetes, Creatinine Clearance, HR                                                                                                                                                                                                | 71277  | 39.8% | 6700  | NR          | Hospitalization period |
| 20031896                             | Mehta <sup>45</sup>     | 2009 | Covariate | Protective | Patients undergoing CABG                                                                                                                            | Reoperation for bleeding in patients undergoing CABG                   | Dialysis, Urgency of Surgery, BSA, Sex, Glycoprotein, Age, Creatinine, PVD, Thienopyridines, Immunosuppressive Therapy, Previous Cardiovascular Interventions, IABP, Shock, PCI, Diabetes, Race, 3-Vessel CAD, Cerebrovascular Disease, Chronic Lung Disease, CHF | 422949 | 27.1% | 10122 | NR          | Hospitalization period |
| 20513595                             | Mehran <sup>24</sup>    | 2010 | Covariate | Harmful    | Patients with ACS including NSTEMI, STEMI, and biomarker negative ACS                                                                               | Non-coronary artery bypass graft surgery (CABG)-related major bleeding | Sex, Anemia, STEMI, NSTEMI-Raised Biomarkers, Age, WBC, Creatinine, Biomarker Negative ACS, UFH/Enox + GPI, Glycoprotein Inhibitor, Bivalirudin                                                                                                                   | 17421  | 28.7% | 744   | 62.1 (11.7) | 30 days                |
| 21700252                             | Mehran <sup>46</sup>    | 2011 | Covariate | Harmful    | Patients undergoing PCI from 3 randomized trials of bivalirudin vs. heparin plus glycoprotein lib/IIIa inhibitors (REPLACE-2, ACUITY, HORIZONS-AMI) | 30 day risk of TIMI Bleed                                              | STEMI, Sex, Smoking, NSTEMI-Raised Biomarkers, Bivalirudin + Glycoprotein Inhibitor, Age, Creatinine, WBC, Normal Biomarkers, Heparin/Enoxaparin + Glycoprotein Inhibitor, Bivalirudin                                                                            | 17034  | 25.6% | 267   | 62.2 (11.4) | 30 days                |
| 22064650                             | Podolecki <sup>47</sup> | 2012 | Covariate | Harmful    | Patients with acute MI who were screened with coronary angiography and underwent PCI                                                                | Stroke (ischemic or hemorrhagic)                                       | Previous Stroke/TIA, Sex, GFR, Nephropathy, Prior Acute MI, Smoking                                                                                                                                                                                               | 2520   | 30%   | 52    | 62 (NR)     | median: 25.5 months    |
| <b>CAD – MORBIDITY AND MORTALITY</b> |                         |      |           |            |                                                                                                                                                     |                                                                        |                                                                                                                                                                                                                                                                   |        |       |       |             |                        |
| 8890808                              | Magovern <sup>48</sup>  | 1996 | Covariate | Harmful    | Patients who underwent CABG surgery                                                                                                                 | Postoperative morbidity and mortality                                  | Shock, Urgency of Operation, Age, Catheterization-Induced Coronary                                                                                                                                                                                                | 1567   | 30%   | NR    | 65 (9)      | Hospitalization period |

|          |                         |      |           |            |                                                                                                                                                                                                                                                                |                                                                                                    |                                                                                                                                                                                      |      |       |      |             |                                                                                                                                                                                        |
|----------|-------------------------|------|-----------|------------|----------------------------------------------------------------------------------------------------------------------------------------------------------------------------------------------------------------------------------------------------------------|----------------------------------------------------------------------------------------------------|--------------------------------------------------------------------------------------------------------------------------------------------------------------------------------------|------|-------|------|-------------|----------------------------------------------------------------------------------------------------------------------------------------------------------------------------------------|
|          |                         |      |           |            |                                                                                                                                                                                                                                                                |                                                                                                    |                                                                                                                                                                                      |      |       |      |             | Closure, Cardiomegaly, LVEF, CHF, Renal Insufficiency, Diabetes, Renal Dysfunction, Anemia, BUN, PVD, Cerebrovascular Disease, Sex, BMI, Atrial Arrhythmia, COPD, Reoperation, Albumin |
| 8890808  | Boersma <sup>23</sup>   | 2000 | Covariate | Harmful    | Patients presenting within 24 hours of an episode of ischemic chest pain (>10 minutes) either transient ST-segment elevation (>0.5 mm), transient or persistent ST-segment depression (>0.5 mm), T-wave inversion (>1.0 mm), or elevation of creatinine kinase | Composite of death or myocardial (re)infarction                                                    | Age, Signs of Heart Failure (Rales), Worst CCS-Class, Sex, ST-Depression on EKG, HR, SBP                                                                                             | 9461 | 35%   | 1417 | 64 (NR)     | 30 days                                                                                                                                                                                |
| 11728352 | Fortescue <sup>49</sup> | 2001 | Covariate | Harmful    | Patients who underwent coronary artery bypass grafting and not involving valvular or other surgeries                                                                                                                                                           | In-hospital major adverse event (death, renal failure, reinfarction, cardiac arrest, CVA, or coma) | Creatinine, Age, Shock, Emergent Operation, Prior CABG, LVEF, History of Liver Disease, History of Stroke or TIA, History of COPD, HTN, Urgent Operation                             | 6237 | 28.1% | 408  | 64.8 (10.6) | Hospitalization period                                                                                                                                                                 |
| 15135693 | Elhendy <sup>27</sup>   | 2004 | Covariate | Protective | Patients with known or suspected CAD                                                                                                                                                                                                                           | Cardiac events                                                                                     | Exercise Wall Motion Score Index, Chest Pain, Metabolic Equivalents, Sex                                                                                                             | 2840 | 42%   | 143  | 62 (12)     | 4 years (median: 3 years)                                                                                                                                                              |
| 16159983 | Grayson <sup>50</sup>   | 2006 | Covariate | Harmful    | Patients undergoing adult percutaneous coronary intervention (PCI)                                                                                                                                                                                             | In-hospital MACE (in-hospital deaths, Q wave MI, emergency CABG surgery, and CVA)                  | Shock, Left Main Stem Lesion Treated, Age, Emergent PCI, Graft Lesion Treated, Sex, Cerebrovascular Disease, Urgent PCI                                                              | 9914 | 29.1% | 129  | NR          | Hospitalization period                                                                                                                                                                 |
| 16210253 | Clayton <sup>29</sup>   | 2005 | Covariate | Protective | Patients with stable symptomatic angina requiring treatment, preserved left ventricular function, and either previous MI or proved angiographic CAD                                                                                                            | Death, MI or stroke                                                                                | Diabetes, Smoking, Age, Previous Stroke, Previous Angiography, QT Interval, Angina, Lipid Lowering Therapy, SBP, LVEF, Sex, Previous MI, Angina Medication, Creatinine, Glucose, WBC | 7311 | 20.6% | 1063 | 63.5 (9.2)  | mean: 4.9 years                                                                                                                                                                        |
| 17443658 | Zhang <sup>51</sup>     | 2007 | Covariate | Protective | Patients with STEMI who did not have emergency intervention therapy within 24hours of onset                                                                                                                                                                    | Cardiogenic shock within 72 hours after admission                                                  | MI, Family History of CAD, Multivessel Disease, BMI, Previous MI, Results of Thrombolytic Therapy, Sex, Age, Killip Class                                                            | 2077 | 28.3% | 184  | 76.0 (7.8)  | 72 hours                                                                                                                                                                               |

|                                      |                        |      |           |                 |                                                                                                                                                                        |                                                                                     |                                                                                                                                                                                                                                                                 |      |       |      |             |                        |
|--------------------------------------|------------------------|------|-----------|-----------------|------------------------------------------------------------------------------------------------------------------------------------------------------------------------|-------------------------------------------------------------------------------------|-----------------------------------------------------------------------------------------------------------------------------------------------------------------------------------------------------------------------------------------------------------------|------|-------|------|-------------|------------------------|
| 17550750                             | Singh <sup>33</sup>    | 2007 | Covariate | Harmful         | Patients undergoing percutaneous coronary intervention                                                                                                                 | MACE (in hospital death, Q wave MI, urgent or emergent CABG, cerebrovascular event) | LVEF, Creatinine, Age, Cardiogenic Shock, MI, PAD, CHF, Diabetes, Sex                                                                                                                                                                                           | 7457 | 31%   | 291  | 66.9 (12.1) | Hospitalization period |
| 19936453                             | Santos <sup>52</sup>   | 2009 | Covariate | Protective      | Patients admitted to the emergency department with non-ST-segment elevation acute coronary syndrome                                                                    | Death or (re)infarction risk within 30 days                                         | Biomarkers, Prior Stroke, Diabetes, Creatinine, Sex, Age, Previous Use of ACE Inhibitor                                                                                                                                                                         | 1027 | 42.6% | 54   | 61.6 (0.35) | 30 days                |
| 20630456                             | Chen <sup>53</sup>     | 2010 | Covariate | Harmful         | Patients with unprotected left main stenosis who underwent percutaneous coronary intervention (patients from DISTAL study)                                             | MACE                                                                                | Acute MI, Shock, Previous MI, IABP, Ultrasound Guidance, Stent, Biomarkers, Incomplete Revascularization, Diabetes, Cholesterol, PVD, LVEF, Age, HTN, Smoking, Creatinine, Culotte, Sex, Non-Left Main Total Occlusion Failure, Statin Use, Stroke, GI Bleeding | 337  | 21.1% | NR   | 66.6 (10.5) | MACE                   |
| 20923988                             | Singh <sup>35</sup>    | 2010 | Covariate | Protective      | Patients who underwent percutaneous coronary intervention                                                                                                              | Mortality or MI                                                                     | LVEF, Age, BMI, CAD Comorbidity Index, Shock, Troponin, Prior CABG, CHF, Ventricular Arrhythmia, Three-Vessel Disease, MI, Smoking Status, Stable Angina, Prior PCI, Sex, UA, Stent Use, Procedural Failure, Glycoprotein Use, Cholesterol, MEDS                | 9165 | 29%   | 1939 | 66.8 (12.2) | Hospitalization period |
| <b>POPULATION SAMPLE – MORBIDITY</b> |                        |      |           |                 |                                                                                                                                                                        |                                                                                     |                                                                                                                                                                                                                                                                 |      |       |      |             |                        |
| 1985385                              | Anderson <sup>54</sup> | 1991 | Covariate | NA <sup>a</sup> | Members of the Framingham Heart Study and Framingham Offspring Study cohorts, who ranged in age from 30 to 74 years who were free of cardiovascular disease and cancer | Myocardial infarction (including silent and unrecognized MI)                        | Age x Sex, Diabetes x Sex, Diabetes, LVH x Sex, Smoking Status, Cholesterol, SBP, Age                                                                                                                                                                           | 5573 | NR    | NR   | NR          | 12 years               |
| 1985385                              | Anderson <sup>54</sup> | 1991 | Covariate | NA <sup>b</sup> | Members of the Framingham Heart Study and Framingham Offspring Study cohorts, who ranged in age from 30 to 74 years who were free of cardiovascular disease and cancer | Stroke, including transient ischemia                                                | Sex, Cholesterol, LVH, Diabetes x Sex, Diabetes, Smoking, Age, SBP                                                                                                                                                                                              | 5573 | NR    | NR   | NR          | 12 years               |
| 1985385                              | Anderson <sup>54</sup> | 1991 | Covariate | NA <sup>c</sup> | Members of the                                                                                                                                                         | Cardiovascular                                                                      | Age x Sex, Diabetes x                                                                                                                                                                                                                                           | 5573 | NR    | NR   | NR          | 12 years               |

|          |                          |      |            |            |                                                                                                                                                                               |                                                                                  |                                                                                                                                                                                                                                                                                                |         |       |                  |                                |                             |
|----------|--------------------------|------|------------|------------|-------------------------------------------------------------------------------------------------------------------------------------------------------------------------------|----------------------------------------------------------------------------------|------------------------------------------------------------------------------------------------------------------------------------------------------------------------------------------------------------------------------------------------------------------------------------------------|---------|-------|------------------|--------------------------------|-----------------------------|
|          |                          |      |            |            | Framingham Heart Study and Framingham Offspring Study cohorts, who ranged in age from 30 to 74 years who were free of cardiovascular disease and cancer                       | disease                                                                          | Sex, Diabetes, LVH, Smoking, Cholesterol, Sex, SBP, Age                                                                                                                                                                                                                                        |         |       |                  |                                |                             |
| 2003301  | Wolf <sup>55</sup>       | 1991 | Stratified | NA         | Subjects in the Framingham Cohort aged 55-84 years and free of stroke                                                                                                         | Incident stroke                                                                  | LVH, Age, AF, CVD, Smoking, Diabetes, SBP, Antihypertensive Therapy                                                                                                                                                                                                                            | 5734    | 58.6% | M: 213<br>F: 259 | 65.8 (NR)                      | 10 years                    |
| 8266381  | D'Agostino <sup>56</sup> | 1994 | Stratified | NA         | Framingham cohort participants aged 55 to 84 years, free of stroke                                                                                                            | Incident stroke                                                                  | Antihypertensive Therapy, LVH, AF, CVD, Smoking, Age, Diabetes, SBP                                                                                                                                                                                                                            | 5734    | 58.6% | NR               | NR                             | 10 years                    |
| 9603539  | Wilson <sup>57</sup>     | 1998 | Stratified | NA         | Population based cohort from the Framingham Heart Study who were free of CVD                                                                                                  | Incident coronary heart disease (CHD)                                            | Baseline Survival Function, Total Cholesterol, HTN, Smoking, Age, HDL Cholesterol, Diabetes                                                                                                                                                                                                    | 5345    | 53.4% | NR               | M: 48.6 (11.7)<br>F: 49.8 (12) | 12 years                    |
| 10371227 | Kannel <sup>58</sup>     | 1999 | Stratified | NA         | Members of the Framingham Heart Study, a population-based cohort aged 45-95 years old, free of heart failure, but predisposed by CAD, hypertension, or valvular heart disease | Heart failure                                                                    | Congenital Heart Disease, Valve Disease, LVH, Cardiomegaly, Age, Diabetes, HR, SBP, Vital Capacity                                                                                                                                                                                             | 15267   | 58.4% | M: 252<br>F: 234 | M: 62 (NR)<br>F: 63.8 (NR)     | 4 years                     |
| 11296578 | Qureshi <sup>59</sup>    | 2001 | Covariate  | Protective | Unselected volunteers without previous stroke, TIA, or carotid artery surgery                                                                                                 | Asymptomatic carotid artery stenosis > 60% by duplex ultrasound                  | Age, CAD, Smoking, Hypercholesterolemia, Sex                                                                                                                                                                                                                                                   | 887     | 69%   | 170              | 66.4 (12.9)                    | Diagnosis                   |
| 11809350 | Lumley <sup>60</sup>     | 2002 | Stratified | NA         | Population-based cohort study of men and women age 65 and older at study entry                                                                                                | Stroke                                                                           | M: Diabetes, LVH, History of CVD, AF, Age, Impaired Fasting Glucose, SBP, Creatinine, 15-ft Walk Time<br>F: AF, Age, History of CVD                                                                                                                                                            | 5888    | 57.6% | NR               | 73 (NR)                        | 5 years (median: 6.3 years) |
| 11822347 | Russell <sup>61</sup>    | 2002 | Stratified | NA         | Medicare recipients hospitalized for deep venous thrombosis or pulmonary embolism                                                                                             | Diagnosis of venous thromboembolism (deep vein thrombosis or pulmonary embolism) | M: Secondary Neoplasm x Age, Renal Failure x Age, Age, Cellulitis, Varicose Veins, Major Orthopedic Procedure, Primary Neoplasm, Corticosteroids, Pneumonia, Arthritis, Warfarin, Brain and/or Spinal Cord Injury, Blood Disorder x Age, COPD x Age, Abnormal Respiration, Diabetes, Potassium | 2823353 | 52.9% | M: 600<br>F: 730 | NR                             | Diagnosis                   |

|          |                       |      |            |            |                                                                                                               |                                                                                                                                                                                |                                                                                  |         |       |                      |                                |                             |                                                                                                                                                                                                                                                                                                                                                                                                                                                                                                                               |
|----------|-----------------------|------|------------|------------|---------------------------------------------------------------------------------------------------------------|--------------------------------------------------------------------------------------------------------------------------------------------------------------------------------|----------------------------------------------------------------------------------|---------|-------|----------------------|--------------------------------|-----------------------------|-------------------------------------------------------------------------------------------------------------------------------------------------------------------------------------------------------------------------------------------------------------------------------------------------------------------------------------------------------------------------------------------------------------------------------------------------------------------------------------------------------------------------------|
|          |                       |      |            |            |                                                                                                               |                                                                                                                                                                                |                                                                                  |         |       |                      |                                |                             | Chloride, Ischemic Heart Disease, Prior DVT and/or PE, Secondary Neoplasm x Age<br>F: Prior DVT and/or PE, Renal Failure x Age, Secondary Neoplasm x Age, Other CVD x Age, Age, Cellulitis, Major Orthopedic Procedure, Corticosteroids, Anemia x Age, Primary Neoplasm, Diabetes, Varicose Veins, Abnormal Respiration, Brain and/or Spinal Cord Injury, Warfarin, Blood Disorder x Age, IBS, COPD x Age, Neoplasm, Arthritis, Potassium Chloride, Hormone Replacement Therapy, Pneumonia, Ischemic Heart Disease, Pregnancy |
| 12086074 | Ciampi <sup>62</sup>  | 2001 | Stratified | NA         | Population based cohort of 18 to 74 years of age surveyed with respect to their cardiovascular status         | Presence of CHD as either a history of MI, aorto-coronary bypass , other forms of specifically defined ischemic cardiopathies or cardiac complications before or after surgery | Family History, Diabetes, Smoking Status, Cholesterol, Age                       | 1147    | 100%  | NR                   | 39.4 (16.6)                    | Diagnosis                   |                                                                                                                                                                                                                                                                                                                                                                                                                                                                                                                               |
| 17088464 | Wu <sup>15</sup>      | 2006 | Stratified | NA         | Men and women aged 35 to 59 years in Beijing and Guangzhou (patients from the USA-PRC study cohort)           | Ischemic stroke                                                                                                                                                                | Diabetes, BMI, Cholesterol, Smoking, SBP, Age                                    | 9903    | 50.6% | M: 158<br>F: 108     | 46 (6)                         | 11 years (mean: 15.1 years) |                                                                                                                                                                                                                                                                                                                                                                                                                                                                                                                               |
| 17586511 | Jee <sup>63</sup>     | 2008 | Stratified | NA         | Koreans aged 30-84 years insured by the National Health Insurance Corporation (NHIC)                          | Stroke                                                                                                                                                                         | Diabetes, Smoking, Cholesterol, Alcohol Intake, Age, Physical Activity, BMI, SBP | 1223740 | 36.5% | M: 29216<br>F: 18017 | M: 46.6 (11)<br>F: 49.4 (12.1) | 10 years (mean: 13 years)   |                                                                                                                                                                                                                                                                                                                                                                                                                                                                                                                               |
| 18036028 | Assmann <sup>64</sup> | 2007 | Covariate  | Protective | Adult employees in the PROCAM study, which excluded subjects with a history of angina pectoris, MI, or stroke | Cerebral ischemic events (ischemic stroke or TIA)                                                                                                                              | Smoking, Diabetes, Age, SBP, Sex                                                 | 26975   | 27.4% | 85                   | 45.7 (6.8)                     | 10 years (mean: 12 years)   |                                                                                                                                                                                                                                                                                                                                                                                                                                                                                                                               |
| 18430204 | Yang <sup>65</sup>    | 2008 | Stratified | NA         | Patients with type 2 diabetes                                                                                 | Heart failure                                                                                                                                                                  | Urinary Albumin to Creatinine Ratio, CHD, Glycated Hemoglobin, BMI, Age, Blood   | 3456    | 54.8% | 131                  | NR                             | median: 5.52 years          |                                                                                                                                                                                                                                                                                                                                                                                                                                                                                                                               |

|                                                    |                         |      |            |                 |                                                                                                                                                                                                            |                                        |                                                                                                                                                                                                                                                                                                                         |       |       |      |               |                             |  |
|----------------------------------------------------|-------------------------|------|------------|-----------------|------------------------------------------------------------------------------------------------------------------------------------------------------------------------------------------------------------|----------------------------------------|-------------------------------------------------------------------------------------------------------------------------------------------------------------------------------------------------------------------------------------------------------------------------------------------------------------------------|-------|-------|------|---------------|-----------------------------|--|
|                                                    |                         |      |            |                 |                                                                                                                                                                                                            |                                        | Hemoglobin                                                                                                                                                                                                                                                                                                              |       |       |      |               |                             |  |
| 19249635                                           | Schanbel <sup>66</sup>  | 2009 | Covariate  | Protective      | Framingham cohort participants free of atrial fibrillation, between ages 45 and 95 years                                                                                                                   | Atrial fibrillation                    | Age, BMI, Age x Murmur, SBP, Murmur, Sex x Age, Prevalent Heart Failure, Sex, Antihypertensive Therapy, Age x Prevalent Heart Failure, Recalibration for Baseline Survival                                                                                                                                              | 4764  | 55%   | 457  | 60.9 (9.9)    | 10 years                    |  |
| 20001655                                           | Kjeldsen <sup>67</sup>  | 2009 | Covariate  | Protective      | Patients with HTN and electrocardiographic LVH randomized to losartan-based versus atenolol-based therapy in the Losartan Intervention For Endpoint reduction in hypertension (LIFE) study                 | Incident myocardial infarction         | History of Angina, Sex, History of Diabetes, Urinary Albumin to Creatinine Ratio, Cholesterol, Pulse Pressure                                                                                                                                                                                                           | 8624  | 54%   | 331  | 66.9 (NR)     | mean: 4.8 years             |  |
| 20535515                                           | Wu <sup>68</sup>        | 2011 | Stratified | NA              | Case-Control: Patients admitted for stroke at community hospitals in Chongqing China                                                                                                                       | Stroke                                 | M: Age, HTN, CHD, Family History of Stroke, Hyperlipidemia, DBP, Family History of HTN, Education Level, Diabetes, High Salt Consumption, Physical Exercise<br>F: Age, HTN, Family History of Stroke, Hyperlipidemia, Diabetes, DBP, Family History of HTN, Education Level, Alcohol Intake, High Salt Consumption, BMI | NR    | NR    | NR   | NR            | NA (Case-Control)           |  |
| 20671251                                           | Chien <sup>69</sup>     | 2010 | Covariate  | Protective      | Stroke-free at baseline                                                                                                                                                                                    | Stroke                                 | AF, Family History of Stroke, Diabetes, Age, DBP, SBP, Sex                                                                                                                                                                                                                                                              | 3513  | 52.7% | 240  | 54.6 (NR)     | 10 years (mean: 15.9 years) |  |
| 21167488                                           | Ramos <sup>70</sup>     | 2011 | Covariate  | Harmful         | Patients free of cardiovascular disease                                                                                                                                                                    | Peripheral arterial disease (ABI <0.9) | Smoking, Diabetes, Sex, Age, Pulse Pressure                                                                                                                                                                                                                                                                             | 4046  | 52%   | 235  | 63.4 (8.6)    | NA (Case-Control)           |  |
| 21177699                                           | McGorrian <sup>71</sup> | 2011 | Covariate  | NA <sup>d</sup> | Case-Control: patients with incident acute MI admitted to coronary care or equivalent unit were matched to at least one sex- and age-matched (within 5 years) control, who had no history of heart disease | Incident MI                            | Lipoprotein, Diabetes, Smoking, HTN, Secondhand Smoke Exposure, Age x Sex                                                                                                                                                                                                                                               | 12772 | 24.7% | 5349 | 57.46 (12.13) | NA (Case-Control)           |  |
| <b>POPULATION SAMPLE – MORBIDITY AND MORTALITY</b> |                         |      |            |                 |                                                                                                                                                                                                            |                                        |                                                                                                                                                                                                                                                                                                                         |       |       |      |               |                             |  |
| 1985385                                            | Anderson <sup>54</sup>  | 1991 | Covariate  | NA <sup>e</sup> | Members of the Framingham Heart                                                                                                                                                                            | Coronary heart disease (MI and         | Sex, Age x Sex, Diabetes, Diabetes x                                                                                                                                                                                                                                                                                    | 5573  | NR    | NR   | NR            | 12 years                    |  |

|          |                        |      |            |            |                                                                                                                                                                                |                                                                                                                                                     |                                                                                                                                                                                                                                |       |       |                  |                                |                               |
|----------|------------------------|------|------------|------------|--------------------------------------------------------------------------------------------------------------------------------------------------------------------------------|-----------------------------------------------------------------------------------------------------------------------------------------------------|--------------------------------------------------------------------------------------------------------------------------------------------------------------------------------------------------------------------------------|-------|-------|------------------|--------------------------------|-------------------------------|
|          |                        |      |            |            | Study and Framingham Offspring Study cohorts, who were free of CVD and cancer                                                                                                  | CHD death plus angina pectoris and coronary insufficiency)                                                                                          | Sex, Smoking, LVH, Cholesterol, SBP, Age                                                                                                                                                                                       |       |       |                  |                                |                               |
| 11724655 | Stevens <sup>72</sup>  | 2001 | Covariate  | Protective | Patients presenting with newly diagnosed diabetes, a fasting plasma glucose >6 mmol/L (108 mg/dL) on 2 further occasions, and no recent history of MI, angina or heart failure | CHD (occurrence of fatal or non-fatal MI or sudden death)                                                                                           | Cholesterol, Smoking, HbA1c, SBP, Duration of Diabetes, Age at Diagnosis of Diabetes, Sex, Ethnicity                                                                                                                           | 4540  | 42.9% | NR               | 52 (8.8)                       | 10 years (median: 10.7 years) |
| 14514579 | Folsom <sup>73</sup>   | 2003 | Stratified | NA         | Adults initially free of CHD in the Atherosclerosis Risk in Communities study                                                                                                  | Incident coronary heart disease (CHD)                                                                                                               | Waist-to-Hip Ratio, Intima Media Thickness, Failure Time Function Constant, Cholesterol, Race, LVH, Smoking, Antihypertensive Therapy, WBC, Creatinine, Age, Keys Score, Factor VIII, SBP, BMI, Sports Activity, Serum Albumin | 1722  | 50%   | M: 212<br>F: 95  | NR                             | 10 years (mean: 10.2 years)   |
| 15173150 | Liu <sup>74</sup>      | 2004 | Stratified | NA         | Chinese Multi-provincial Cohort Study aged 35 to 64 years free of CVD                                                                                                          | CHD (coronary death and myocardial infarction)                                                                                                      | HDL Cholesterol, Total Cholesterol, HTN, Smoking, Diabetes, Age                                                                                                                                                                | 5251  | 53.6% | M: 195<br>F: 78  | 49 (NR)                        | 10 years                      |
| 16732001 | Donnan <sup>75</sup>   | 2006 | Covariate  | Protective | Subjects with a diagnosis of type 2 diabetes residing in Tayside, Scotland                                                                                                     | Major CHD events defined as fatal or nonfatal AMI or CHD death                                                                                      | Smoking, Treated HTN, Height, SBP x Treated HTN, HbA1c, Sex, SBP, Age at Diagnosis, Total Cholesterol, Duration of Diabetes, HbA1c x Follow Up                                                                                 | 4569  | 47.4% | 243              | 59.5 (12.1)                    | 5 years (median: 4.1 years)   |
| 17088464 | Wu <sup>15</sup>       | 2006 | Stratified | NA         | Men and women in Beijing and Guangzhou (patients from the USA-PRC study cohort)                                                                                                | Ischemic cardiovascular disease (ICVD) events                                                                                                       | SBP, Smoking, Total Cholesterol, BMI, Diabetes, Age                                                                                                                                                                            | 9903  | 50.6% | M: 224<br>F: 147 | 46 (6)                         | 11 years (mean: 15.1 years)   |
| 17088464 | Wu <sup>15</sup>       | 2006 | Stratified | NA         | Men and women in Beijing and Guangzhou (patients from the USA-PRC study cohort)                                                                                                | Incident CHD event (defined as MI, possible acute MI and coronary death, ischemic cardiac arrest with successful resuscitation, excluded silent MI) | BMI, Diabetes, Total Cholesterol, Smoking, Age, SBP                                                                                                                                                                            | 9903  | 50.6% | M: 66<br>F: 39   | 46 (6)                         | 11 years (mean: 15.1 years)   |
| 17090561 | Woodward <sup>76</sup> | 2007 | Stratified | NA         | Patients without CHD and whose prior diagnosis was not a TIA                                                                                                                   | 10-year cardiovascular risk (cardiovascular death, hospitalization for CHD,                                                                         | Diabetes, Family History, Total Cholesterol, Scottish Index of Multiple Deprivation Score, Age, Smoking, SBP,                                                                                                                  | 13297 | 50.8% | M: 743<br>F: 422 | M: 48.9 (0.1)<br>F: 48.8 (0.1) | 10 years                      |

|          |                             |      |            |            |                                                                                                                                                                              |                                                                                      |                                                                                                                                                                                                                       |         |       |                      |                                  |                           |
|----------|-----------------------------|------|------------|------------|------------------------------------------------------------------------------------------------------------------------------------------------------------------------------|--------------------------------------------------------------------------------------|-----------------------------------------------------------------------------------------------------------------------------------------------------------------------------------------------------------------------|---------|-------|----------------------|----------------------------------|---------------------------|
|          |                             |      |            |            |                                                                                                                                                                              | cerebrovascular disease, or any coronary artery intervention)                        | HDL Cholesterol                                                                                                                                                                                                       |         |       |                      |                                  |                           |
| 17478150 | Mainous <sup>77</sup>       | 2007 | Stratified | NA         | Population-based cohort of adults in Atherosclerosis Risk in Communities Study (ARIC) who were free of cardiovascular disease at baseline                                    | Incident CHD                                                                         | M: 10-year CHD Risk, Age, History of Diabetes, Smoking, Hypercholesterolemia, Family History of CAD, HTN, Physical Activity<br>F: 10-year CHD Risk, Age, History of Diabetes, Smoking, HTN, BMI, Hypercholesterolemia | 14343   | 56.5% | NR                   | 54.4 (5.7)                       | 10 years                  |
| 17615182 | Hippisley-Cox <sup>78</sup> | 2007 | Stratified | NA         | Population based cohort ages 35-74 free of cardiovascular disease                                                                                                            | Cardiovascular disease (MI, CHD, stroke, TIA)                                        | Age, Antihypertensive Therapy, Smoking, Family History of CVD, Townsend Score of Output Area, BMI, SBP, Cholesterol                                                                                                   | 1283174 | 49.6% | M: 37843<br>F: 27828 | NR                               | 10 years                  |
| 18036028 | Assmann <sup>64</sup>       | 2007 | Covariate  | Protective | Adult employees in the PROCAM study which excluded subjects with a history of angina pectoris, myocardial infarction, or stroke                                              | Major coronary events                                                                | Fasting Blood Glucose or Diabetes, HDL Cholesterol, LDL Cholesterol, SBP, Family History, Triglycerides, Smoking                                                                                                      | 26975   | 31.6% | 511                  | 45.7 (6.8)                       | 10 years (mean: 12 years) |
| 18212285 | D'Agostino <sup>79</sup>    | 2008 | Stratified | NA         | Healthy participants free of CVD in the original Framingham Heart Study and the Framingham Offspring Study                                                                   | CVD events and death                                                                 | Age, SBP x Treatment, Total Cholesterol, Smoking, Diabetes, HDL Cholesterol                                                                                                                                           | 8491    | 53.3% | M: 718<br>F: 456     | M: 48.5 (10.8)<br>F: 49.1 (11.1) | 10 years                  |
| 18591403 | Cederholm <sup>80</sup>     | 2008 | Covariate  | Protective | Type 2 diabetics, defined treatment with 1) diet only, 2) oral hypoglycemic agents only, or 3) insulin only or combined with oral agents, and onset age of diabetes 40 years | First incident fatal or nonfatal CVD                                                 | Sex, Smoking, Lipid Lowering Therapy, Antihypertensive Therapy, HbA1c, Diabetes Duration, Onset Age, BMI, SBP                                                                                                         | 11646   | 43.1% | 990                  | 50.7 (9.8)                       | 5 years                   |
| 18591432 | Wilson <sup>81</sup>        | 2008 | Covariate  | Protective | Men and women who were the offspring and spouses of the participants in the original Framingham Heart Study, who were free from CHD and CVD                                  | First CHD Event (MI, angina pectoris, coronary insufficiency, and CHD-related death) | Smoking, Diabetes, Age, Cholesterol, BMI, SBP, Sex                                                                                                                                                                    | 4780    | 51.6% | 492                  | 36.7 (9.75)                      | 24 years                  |
| 18762707 | Teramoto <sup>82</sup>      | 2008 | Covariate  | Protective | Patients with hypercholesterolemia (total cholesterol 220-270 mg/dl) and no history of ischemic heart disease or stroke, assigned either to diet alone or diet in            | CHD                                                                                  | Glucose x HTN, HTN, Age, Sex, HDL Cholesterol, Smoking, LDL Cholesterol, Diet, Diet + Pravastatin                                                                                                                     | 7832    | 68.5% | 138                  | 58.3 (7.2)                       | 5 years (mean: 5.3 years) |



|                                    |                         |      |            |                 |                                                                                                                                                                                         |                                                                                                                                                    |                                                                                                                                                                                                    |       |       |      |                                |                           |
|------------------------------------|-------------------------|------|------------|-----------------|-----------------------------------------------------------------------------------------------------------------------------------------------------------------------------------------|----------------------------------------------------------------------------------------------------------------------------------------------------|----------------------------------------------------------------------------------------------------------------------------------------------------------------------------------------------------|-------|-------|------|--------------------------------|---------------------------|
|                                    |                         |      |            |                 | combination with pravastatin (10-20 mg/day)                                                                                                                                             |                                                                                                                                                    |                                                                                                                                                                                                    |       |       |      |                                |                           |
| 19157168                           | Maracy <sup>83</sup>    | 2008 | Covariate  | Protective      | Type 2 diabetics seen at a metabolism clinic                                                                                                                                            | Ischemic heart disease                                                                                                                             | Age, Sex, BMI, Duration, HTN, BMI                                                                                                                                                                  | 2101  | 56%   | 773  | NR                             | NA (cross-sectional)      |
| 19763133                           | Arima <sup>84</sup>     | 2009 | Covariate  | Protective      | Healthy individuals living in the town of Hisayama, a suburb of Fukuoka City in Southern Japan                                                                                          | Cardiovascular disease                                                                                                                             | Sex, Diabetes, Smoking, Age, SBP, LDL Cholesterol, HDL Cholesterol                                                                                                                                 | 1756  | 57%   | 216  | 59 (12)                        | 14 years                  |
| 19958966                           | Sacco <sup>85</sup>     | 2009 | Covariate  | Protective      | Community participants free of stroke and coronary artery disease                                                                                                                       | Combined cardiovascular outcomes (stroke, myocardial infarction, or vascular death)                                                                | Race, SBP, Physical Activity, Smoking, Alcohol Intake, Total Cholesterol, PVD, DBP x Antihypertensive Therapy, Waist, DBP, Age, FBS                                                                | 2737  | 63.2% | NR   | 68.8 (10.4)                    | median: 9 years           |
| 20001655                           | Kjeldsen <sup>67</sup>  | 2009 | Covariate  | Protective      | Patients with HTN and electrocardiographic LVH randomized to losartan-based vs. atenolol-based therapy in the Losartan Intervention For Endpoint reduction in hypertension (LIFE) study | Cardiovascular death, stroke, or MI                                                                                                                | Sex, History of AF, History of Stroke or TIA, Smoking, History of Diabetes, Age, History of Ischemic Heart Disease, Urinary Albumin to Creatinine Ratio, LVH, Total Cholesterol, Physical Activity | 9193  | 54%   | 1096 | 66.9 (NR)                      | mean: 4.8 years           |
| 20236721                           | Zgibor <sup>86</sup>    | 2010 | Stratified | NA              | Participants in the Pittsburgh Epidemiology of Diabetes Complications Study (EDC) cohort who had childhood type 1 diabetes diagnosis at least 6 years prior to enrollment               | Hard CHD event (first nonfatal MI that was confirmed by medical records or Q-waves on ECG's according to Minnesota codes 1.1 or 1.2) and fatal CHD | M: HDL Cholesterol, Diabetes Duration, WBC, Microalbuminuria<br>F: SBP, Antihypertensive Therapy, Diabetes Duration, Non-HDL Cholesterol, Waist-to-Hip Ratio                                       | 603   | 49.6% | NR   | M: 27.1 (7.6)<br>F: 27.3 (7.9) | 15 years                  |
| 21719139                           | Zethelius <sup>87</sup> | 2011 | Covariate  | Protective      | Patients in a population based registry for type II diabetes                                                                                                                            | Fatal/nonfatal CVD                                                                                                                                 | Previous CVD, Onset Age, Diabetes Duration, SBP, BMI, Macroalbuminuria, AF, Sex, Smoking, Microalbuminuria, Cholesterol, HbA1c                                                                     | 24288 | 40%   | 2488 | 62 (9)                         | 5 years (mean: 4.8 years) |
| 22374565                           | Kang <sup>88</sup>      | 2012 | Covariate  | NA <sup>f</sup> | Population-based cohort with an equal portion of rural and urban participants from Jiangsu province of China, who were followed for incident diabetes and CVD                           | Incident coronary heart disease (CHD) and stroke                                                                                                   | Age, BP, Triglycerides, Sex x Waist Circumference, HDL Cholesterol, Fasting Plasma Glucose                                                                                                         | 3598  | 59.7% | 87   | 50.2 (NR)                      | median: 6.3 years         |
| <b>CARDIAC SURGERY – MORTALITY</b> |                         |      |            |                 |                                                                                                                                                                                         |                                                                                                                                                    |                                                                                                                                                                                                    |       |       |      |                                |                           |
| 7828293                            | Tu <sup>89</sup>        | 1995 | Covariate  | Harmful         | Patients undergoing cardiac surgery                                                                                                                                                     | In-hospital mortality                                                                                                                              | Urgency of Surgery, Age, Type of Surgery, Left Ventricular                                                                                                                                         | 6213  | NR    | 229  | NR                             | Hospitalization           |

|          |                         |      |           |         |                                                                                                                                                                                                                                 |                       |                                                                                                                                                                                                                                                                                                                                                                                                                                                                                                                                                            |       |       |     |      |                        |
|----------|-------------------------|------|-----------|---------|---------------------------------------------------------------------------------------------------------------------------------------------------------------------------------------------------------------------------------|-----------------------|------------------------------------------------------------------------------------------------------------------------------------------------------------------------------------------------------------------------------------------------------------------------------------------------------------------------------------------------------------------------------------------------------------------------------------------------------------------------------------------------------------------------------------------------------------|-------|-------|-----|------|------------------------|
|          |                         |      |           |         |                                                                                                                                                                                                                                 |                       | Function, Repeat Operation, Sex, Elective Surgery, CABG                                                                                                                                                                                                                                                                                                                                                                                                                                                                                                    |       |       |     |      | period                 |
| 10456395 | Nashef <sup>90</sup>    | 1999 | Covariate | Harmful | Patients undergoing cardiac surgery                                                                                                                                                                                             | Early mortality       | Postinfarct Septal Rupture, Endocarditis, Critical Preoperative State, Left Ventricular Dysfunction, Previous Cardiac Surgery, Surgery on Thoracic Aorta, Emergency Operation, Neurological Dysfunction, Operation Other Than CABG, Pulmonary HTN, Recent MI, Creatinine, UA, Arteriopathy, Chronic Pulmonary Disease, Sex, Age                                                                                                                                                                                                                            | 13302 | NR    | NR  | NR   | NR                     |
| 10750767 | Bernstein <sup>91</sup> | 2000 | Covariate | Harmful | Patients who had open-heart surgery evaluated with planar thallium myocardial perfusion imaging. Surgical procedures included aortocoronary bypass (ACB), valve replacement or repair (VLV), and combinations of the two (COM). | In-hospital mortality | Reoperation, Dialysis, Cirrhosis, Cardiogenic Shock, Ideopathic Thrombopenic Purpura, Age, Sex, Pulmonary HTN, LVEF, Endocarditis, Bypass Surgery, COPD, Failed Angioplasty or Catheterization, Neurologic Disorder, Tricuspid Valve Replacement, Substance Abuse, Mitral Valve Replacement, Intubated, Acute MI, Preoperative IABP, PVD, Renal Failure, Diabetes, HTN, CHF, Cardiomegaly, Left Main Disease, Carotid Disease, Aneurysm, Asthma, VT or VF, BMI, Pacemaker Dependency, Neoplasm, Cold Agglutinins, Blood Products Refused, Immunodeficiency | 8593  | NR    | 455 | NR   | Hospitalization period |
| 14583307 | Huijskes <sup>92</sup>  | 2003 | Covariate | Harmful | Patient who underwent a CABG and/or heart valve operation                                                                                                                                                                       | In-hospital mortality | MI, Prior Cardiac Surgery, Creatinine, Emergency Procedure, LVEF, CABG, Sex, Age                                                                                                                                                                                                                                                                                                                                                                                                                                                                           | 4855  | 27%   | 171 | NR   | Hospitalization period |
| 15172248 | Nowicki <sup>93</sup>   | 2004 | Covariate | Harmful | Patients undergoing                                                                                                                                                                                                             | In-hospital mortality | Emergent Priority, Age,                                                                                                                                                                                                                                                                                                                                                                                                                                                                                                                                    | 3150  | 48.4% | 296 | 66.7 | Hospitaliz             |

|          |                        |      |           |         |                                                                                                                                         |                         |                                                                                                                                                                                                                    |       |       |      |             |                        |
|----------|------------------------|------|-----------|---------|-----------------------------------------------------------------------------------------------------------------------------------------|-------------------------|--------------------------------------------------------------------------------------------------------------------------------------------------------------------------------------------------------------------|-------|-------|------|-------------|------------------------|
|          |                        |      |           |         | mitral valve surgery                                                                                                                    |                         | Prior Stroke, NYHA Class, CAD, Urgent Priority, Valve Replacement, Creatinine, CHF, Diabetes, Sex, Year                                                                                                            |       |       | (NR) |             | ation period           |
| 15998680 | Ambler <sup>94</sup>   | 2005 | Covariate | Harmful | Patients who underwent aortic and/or mitral heart valve surgery (included both repair and replacement surgeries)                        | In-hospital mortality   | Priority of Surgery, Renal Failure, Age, Operation Sequence, LVEF, Concomitant Tricuspid Surgery, Valve Operation, Preoperative Arrhythmia, CABG, BMI, HTN, Diabetes, Sex, Year                                    | 16679 | 41.6% | 1067 | 64.8 (12.3) | Hospitalization period |
| 16039188 | Jin <sup>95</sup>      | 2005 | Covariate | Harmful | Patients aged 30 to 95 years who underwent aortic valve replacement (AVR) or mitral valve replacement or repair (MVRR)                  | Operative Mortality     | Priority of Operation, Creatinine, History of Cardiac Surgery, BMI, Pulmonary HTN, COPD, PVD, AF, CABG, NYHA Class, Sex, Age                                                                                       | 1596  | NR    | 96   | NR          | Hospitalization period |
| 17307434 | Hannan <sup>96</sup>   | 2007 | Covariate | Harmful | Patients who underwent isolated cardiac valve surgery (valve surgery without CABG) or cardiac valve surgery along with concomitant CABG | In-hospital mortality   | Shock, Hepatic Failure, Dialysis, MI, Multiple Valve Repair or Replacement, Endocarditis, Creatinine, Previous Open Heart Operation, PAD, COPD, Mitral Valve Replacement or Repair, Sex, Age                       | 10702 | 39%   | 472  | NR          | Hospitalization period |
| 17307434 | Hannan <sup>96</sup>   | 2007 | Covariate | Harmful | Patients who underwent isolated cardiac valve surgery (valve surgery without CABG) or cardiac valve surgery along with concomitant CABG | In-hospital mortality   | Shock, Dialysis, Mitral Valve Repair or Replacement or CABG, MI, Creatinine, Endocarditis, LVEF, Previous Open Heart Operation, Sex, Extensively Calcified Ascending Aorta, Cerebrovascular Disease, Diabetes, Age | 8823  | 39%   | 784  | NR          | Hospitalization period |
| 19523840 | Nissinen <sup>97</sup> | 2009 | Covariate | Harmful | Patients who underwent cardiac surgery                                                                                                  | Postoperative mortality | Age, LVEF, CKD, Sex, Number of Procedures, Ventricular Septal Defect, Thoracic Aorta Surgery, Critical Preoperative Status, Neurological Dysfunction, Pulmonary Disease, Reoperation, Extracardiac Arteriopathy    | 3613  | 22.5% | 90   | 67.7 (10.3) | 30 days                |

|                                         |                         |      |           |                 |                                                                                                                                                                                                                                            |                                                                                                                |                                                                                                                                                                                                                                                                                                                                                                                                          |        |        |      |             |                 |
|-----------------------------------------|-------------------------|------|-----------|-----------------|--------------------------------------------------------------------------------------------------------------------------------------------------------------------------------------------------------------------------------------------|----------------------------------------------------------------------------------------------------------------|----------------------------------------------------------------------------------------------------------------------------------------------------------------------------------------------------------------------------------------------------------------------------------------------------------------------------------------------------------------------------------------------------------|--------|--------|------|-------------|-----------------|
| 19559823                                | O'Brien <sup>98</sup>   | 2009 | Covariate | NA <sup>g</sup> | Patients who underwent isolated single aortic or mitral valve surgery                                                                                                                                                                      | Mortality                                                                                                      | BSA, Level of Urgency, Dialysis, Sex x BSA, Reoperation, Mitral Valve Repair, Endocarditis, CHF x NYHA Class, Diabetes, Shock, Creatinine, IABP or Inotropes, Immunosuppressive Treatment, Chronic Lung Disease, PVD, Stenosis, UA, AF, Left Main Disease, MI, HTN, Mitral Valve Replacement, Age, LVEF, CVD, Prior CVA, Mitral Insufficiency, Tricuspid Insufficiency, Number of Diseased Vessels, Race | 109759 | 44.6%  | 3706 | NR          | 30 days         |
| <b>STROKE – MORBIDITY AND MORTALITY</b> |                         |      |           |                 |                                                                                                                                                                                                                                            |                                                                                                                |                                                                                                                                                                                                                                                                                                                                                                                                          |        |        |      |             |                 |
| 1527533                                 | Hankey <sup>99</sup>    | 1992 | Covariate | Protective      | Transient ischemic attack patients referred to a university hospital without prior stroke                                                                                                                                                  | Stroke, myocardial infarction, or vascular death                                                               | PVD, Carotid and Vertebral-Basilar TIAs, Brain TIA, Sex, Neurological Signs, LVH, Age, Number of TIAs                                                                                                                                                                                                                                                                                                    | 469    | 32.4%  | 118  | 62.1 (12)   | mean: 4.1 years |
| 1527533                                 | Hankey <sup>99</sup>    | 1992 | Covariate | Protective      | Transient ischemic attack patients referred to a university hospital without prior stroke                                                                                                                                                  | Coronary event                                                                                                 | Carotid and Vertebral-Basilar TIAs, Sex, Ischemic Heart Disease, PVD, Neurological Signs, LVH, Age, Number of TIAs                                                                                                                                                                                                                                                                                       | 469    | 32.40% | 58   | 62.1 (12)   | mean: 4.1 years |
| 8290048                                 | Lisk <sup>100</sup>     | 1994 | Covariate | Harmful         | Patients with intracerebral hemorrhage                                                                                                                                                                                                     | Poor outcome (Rankin scale 5 and death)                                                                        | Admission Interval, Age, DBP, Hemorrhage Location, Surgery, SBP, Sex, Pupil Abnormality, Mental Status, Mass Effect, Hemorrhage Size, Hyperventilation, Subarachnoid Blood, Ventricular Extension, GCS                                                                                                                                                                                                   | 75     | 59%    | 35   | 58.6 (16.4) | mean: 18 days   |
| 10382694                                | Rothwell <sup>101</sup> | 1999 | Covariate | Harmful         | Patients were recruited to ECST if they had had a carotid distribution TIA, minor ischemic stroke, non-disabling major ischemic stroke, or a retinal infarction in the previous 6 months, and had evidence of ipsilateral carotid stenosis | Any major stroke (fatal or lasting longer than 7 days) or death from any other cause within 30 days of surgery | PVD, SBP, Sex                                                                                                                                                                                                                                                                                                                                                                                            | 1208   | NR     | 117  | NR          | 30 days         |

|                           |                         |      |           |            |                                                                                                       |                                                                     |                                                                                                                                                                                           |      |        |      |               |                        |
|---------------------------|-------------------------|------|-----------|------------|-------------------------------------------------------------------------------------------------------|---------------------------------------------------------------------|-------------------------------------------------------------------------------------------------------------------------------------------------------------------------------------------|------|--------|------|---------------|------------------------|
| 17068305                  | Kent <sup>102</sup>     | 2006 | Covariate | Protective | Patients with acute stroke being evaluated for thrombolysis                                           | Normal/Near-Normal outcome (mRS $\leq$ 1)                           | rt-PA Treatment, Sex, Prior Stroke, Age, Symptom Onset to Treatment Time, Age x NIHSS, Treatment x Time, SBP, NIHSS, Treatment x SBP, Treatment x Sex, Diabetes, Treatment x Prior Stroke | 2131 | 45.3%  | 773  | 65.9 (11.4)   | Hospitalization period |
| 18823637                  | Koopman <sup>103</sup>  | 2009 | Covariate | Protective | Cerebral venous thrombosis (CVT) patients aged older than 15 years who were evaluated in the hospital | Poor outcome (mRS > 2)                                              | CNS Infection, CVT, Malignancy, GCS, Age, Mental Status Disorder, Intracranial Hemorrhage, Sex                                                                                            | 90   | 78%    | 16   | 36.2 (NR)     | mean: 1.58 years       |
| 19420921                  | Ferro <sup>104</sup>    | 2009 | Covariate | Protective | Patient who had cerebral vein and dural sinus thrombosis                                              | mRS > 2                                                             | Malignancy, Coma, DVT, Mental Status Disturbance, Sex, Intracranial hemorrhage                                                                                                            | 624  | 74%    | 19   | NR            | median: 1.3 years      |
| <b>STROKE – MORTALITY</b> |                         |      |           |            |                                                                                                       |                                                                     |                                                                                                                                                                                           |      |        |      |               |                        |
| 9645975                   | Arboix <sup>105</sup>   | 1998 | Covariate | Protective | Patients with cardioembolic cerebral infarction                                                       | In-hospital mortality                                               | Altered Consciousness, Limb Weakness, CHF, Sex, Age                                                                                                                                       | 231  | 62.8%  | 63   | NR            | Hospitalization period |
| 18004645                  | Roquer <sup>106</sup>   | 2007 | Covariate | Protective | Patients with acute ischemic stroke                                                                   | In-hospital mortality                                               | Age, Sex, NIHSS, Glycemia                                                                                                                                                                 | 1527 | 49.50% | 197  | 73 (12)       | Hospitalization period |
| 21300951                  | Saposnik <sup>107</sup> | 2011 | Covariate | Protective | Patients presenting with an acute ischemic stroke                                                     | Mortality                                                           | Stroke Severity, Stroke Subtype, Renal Dialysis, Glucose, Preadmission Disability, AF, Cancer, CHF, Sex, Age                                                                              | 8223 | 47.4%  | 1004 | 72.04 (13.86) | 30 days                |
| 21300951                  | Saposnik <sup>107</sup> | 2011 | Covariate | Protective | Patients presenting with an acute ischemic stroke                                                     | Mortality                                                           | Stroke Severity, Renal Dialysis, Stroke Subtype, Preadmission Disability, Cancer, CHF, Glucose, Smoking, AF, Previous MI, Sex, Age                                                        | 8223 | 47.4%  | 1853 | 72.04 (13.86) | 1 year                 |
| <b>VTE – MORBIDITY</b>    |                         |      |           |            |                                                                                                       |                                                                     |                                                                                                                                                                                           |      |        |      |               |                        |
| 10074953                  | Kuijjer <sup>108</sup>  | 1999 | Covariate | Harmful    | Patients with confirmed venous thromboembolism                                                        | All bleeding complications                                          | Malignancy, Age, Sex                                                                                                                                                                      | 241  | 45.6%  | 63   | 60.7 (17)     | 3 months               |
| 10102459                  | Kahn <sup>109</sup>     | 1999 | Covariate | Protective | Patients suspected of deep vein thrombosis                                                            | Deep vein thrombosis                                                | Orthopedic Surgery, Superficial Venous Dilation, Sex, Temperature                                                                                                                         | 271  | 50.60% | 73   | 57.1 (16.9)   | 6 months               |
| 12637130                  | Miniati <sup>110</sup>  | 2003 | Covariate | Protective | Patients who were referred for suspected pulmonary embolism                                           | Pulmonary embolism (diagnosis was based on angiographic or autopsy) | Amputation of Hilar Artery, Oligemia, Consolidation, EKG Signs of Acute Right Ventricular Overload,                                                                                       | 1100 | 55%    | 440  | NR            | Diagnosis              |

|                                    |                             |      |           |            |                                                                                                                           |                                                                 |                                                                                                                                                                            |       |       |      |           |                        |
|------------------------------------|-----------------------------|------|-----------|------------|---------------------------------------------------------------------------------------------------------------------------|-----------------------------------------------------------------|----------------------------------------------------------------------------------------------------------------------------------------------------------------------------|-------|-------|------|-----------|------------------------|
|                                    |                             |      |           |            |                                                                                                                           | documentation)                                                  | Dyspnea, Age, Hemoptysis, Sex, Thrombophlebitis, Chest Pain, Pre-Existing Disease, Fever, Pulmonary Edema                                                                  |       |       |      |           |                        |
| 14563499                           | Constans <sup>111</sup>     | 2003 | Covariate | Protective | Outpatients with suspected deep venous thrombosis                                                                         | In-hospital deep venous thrombosis                              | Unilateral Pain, Lower Limb Enlargement, Lower Limb Paralysis, Confinement to Bed, Sex, Other Diagnosis                                                                    | 444   | 66.2% | 126  | 61 (18)   | Hospitalization period |
| 16607053                           | Chen <sup>112</sup>         | 2006 | Covariate | Harmful    | Patients with acute dyspnea presenting in the emergency room                                                              | Pulmonary embolism diagnosis at admission                       | Leg Edema, EKG RV Strain Signs, High Alveolar-Arterial Oxygen Gradient, Clear Chest Roentgenogram, Cough, Sex, Unclear Breath Sounds, Chest Tightness                      | 148   | 45.3% | 56   | 66.3 (17) | NA (case control)      |
| 18436792                           | Miniati <sup>113</sup>      | 2008 | Covariate | Protective | Patients referred from a department or another hospital for suspected pulmonary embolism                                  | Pulmonary embolism confirmed by angiography or autopsy findings | Dyspnea, Acute Cor Pulmonale, Age, Chest Pain, Hemoptysis, Leg Swelling, Syncope, DVT, Sex, Orthopnea, Immobilization, CVD, Crackles, Pulmonary Disease, Wheezes, Fever    | 1100  | 55%   | 440  | NR        | Diagnosis              |
| <b>AORTIC DISEASES – MORTALITY</b> |                             |      |           |            |                                                                                                                           |                                                                 |                                                                                                                                                                            |       |       |      |           |                        |
| 16146566                           | Urbonavicius <sup>114</sup> | 2005 | Covariate | Harmful    | Patients with a diagnosis of AAA who were treated surgically                                                              | Post-operative mortality                                        | Previous MI, Sex, Clinical Course of Abdominal Aortic Aneurysm                                                                                                             | 69    | 24.6% | 8    | NR        | 30 days                |
| 19249184                           | Giles <sup>115</sup>        | 2009 | Covariate | Harmful    | Propensity score matched Medicare beneficiaries undergoing elective open or endovascular abdominal aortic aneurysm repair | Perioperative mortality                                         | Open Repair, Age, Renal Disease, Chronic Renal Insufficiency, CHF, Vascular Disease, Sex                                                                                   | 22830 | 19.7% | 1621 | NR        | 30 days                |
| 19782526                           | Egorova <sup>116</sup>      | 2009 | Covariate | Harmful    | Medicare Patients > 65 years old hospitalized after undergoing Endovascular aneurysm repair (EVAR)                        | Mortality                                                       | Renal Failure, Lower Extremity Ischemia, Age, CHF, Liver Disease, Sex, Neurological Risk Factor, COPD, Hospital Annual Volume, Surgeon Endovascular Aneurysm Repair Volume | 44630 | 17.1% | NR   | NR        | 30 days                |
| 21412997                           | Grant <sup>117</sup>        | 2011 | Covariate | Harmful    | Patients undergoing elective abdominal aortic aneurysm repair surgery                                                     | 30-day all-cause mortality                                      | Open Surgery, Antiplatelet Therapy, Sex, Diabetes, Respiratory Disease,                                                                                                    | 1936  | 17.7% | 31   | NR        | 30 days                |

| Age, Creatinine               |                          |      |            |                 |                                                                                                                                                                        |                                       |                                                                                                                                                                              |       |       |                            |                                      |                 |
|-------------------------------|--------------------------|------|------------|-----------------|------------------------------------------------------------------------------------------------------------------------------------------------------------------------|---------------------------------------|------------------------------------------------------------------------------------------------------------------------------------------------------------------------------|-------|-------|----------------------------|--------------------------------------|-----------------|
| POPULATION SAMPLE – MORTALITY |                          |      |            |                 |                                                                                                                                                                        |                                       |                                                                                                                                                                              |       |       |                            |                                      |                 |
| 1985385                       | Anderson <sup>54</sup>   | 1991 | Covariate  | NA <sup>b</sup> | Members of the Framingham Heart Study and Framingham Offspring Study cohorts, who ranged in age from 30 to 74 years who were free of cardiovascular disease and cancer | Death from CHD (sudden or non-sudden) | Sex, Diabetes, LVH, Smoking, Diabetes x Sex, Cholesterol, SBP, Age                                                                                                           | 5573  | NR    | NR                         | NR                                   | 12 years        |
| 1985385                       | Anderson <sup>54</sup>   | 1991 | Covariate  | NA <sup>b</sup> | Members of the Framingham Heart Study and Framingham Offspring Study cohorts, who ranged in age from 30 to 74 years who were free of cardiovascular disease and cancer | Cardiovascular death                  | Sex, Diabetes, Smoking, Diabetes x Sex, LVH, Cholesterol, SBP, Age                                                                                                           | 5573  | NR    | NR                         | NR                                   | 12 years        |
| 9425461                       | Knuiman <sup>118</sup>   | 1997 | Stratified | NA              | General population health survey of people living in Western Australia                                                                                                 | Mortality                             | Smoking, Cholesterol, BMI, Age, SBP                                                                                                                                          | 3891  | 50.6% | M: 116<br>F: 71            | M: 56.4<br>(9.7)<br>F: 55.8<br>(9.3) | 10 years        |
| 11006890                      | Kornitzer <sup>119</sup> | 2000 | Stratified | NA              | Free of coronary heart disease (CHD) at baseline                                                                                                                       | CHD mortality                         | HDL Cholesterol, Total Cholesterol, Age, Smoking, SBP                                                                                                                        | 6066  | 29.0% | M: 84<br>F: 30             | NR                                   | 10 years        |
| 11451781                      | Pocock <sup>120</sup>    | 2001 | Stratified | NA              | Patients included in anti-hypertensive drug trials                                                                                                                     | Cardiovascular death                  | Age, Smoking, Creatinine, Diabetes, Height, History of MI, History of Stroke, LVH, SBP, Total Cholesterol                                                                    | NR    | NR    | M:<br>27987<br>F:<br>20802 | NR                                   | mean: 5.2 years |
| 12788299                      | Conroy <sup>121</sup>    | 2003 | Stratified | NA              | General population                                                                                                                                                     | Fatal cardiovascular disease          | Cholesterol, Sex, Smoking, SBP                                                                                                                                               | NR    | 0%    | NR                         | NR                                   | 10 years        |
| 15662552                      | Balkau <sup>122</sup>    | 2004 | Stratified | NA              | Population-based studies or large studies in occupational groups in Europe                                                                                             | Mortality                             | Cholesterol, Smoking, SBP, Diabetes, Fasting Plasma Glucose, Impaired Glucose Regulation, Age                                                                                | 25413 | 35.0% | M: 301<br>F: 56            | NR                                   | 5 years         |
| 15662552                      | Balkau <sup>122</sup>    | 2004 | Stratified | NA              | Population-based studies or large studies in occupational groups in Europe                                                                                             | Mortality                             | M: Fasting Plasma Glucose, Diabetes, Age, Impaired Glucose Regulation<br>F: Age, Fasting Plasma Glucose, Diabetes, Diabetes                                                  | 25413 | 35.0% | M: 632<br>F: 159           | NR                                   | 10 years        |
| 15933390                      | Porock <sup>123</sup>    | 2005 | Covariate  | Protective      | Long-term-care residents in nursing home                                                                                                                               | Mortality                             | Cancer, Admission, Deteriorated, Age, Cancer x Age, Admission x Deteriorated, Shortness of Breath, Renal Disease, Sex, Loss of Appetite, Dehydrated, Weight Loss, CHF, ADLs, | 32599 | 73.7% | 7473                       | NR                                   | 6 months        |

|                               |                         |      |           |            |                                                                                                                                                                                                                                                             |                                                                        |                                                                                                                                                                             |       |        |      |           |                              |                                       |
|-------------------------------|-------------------------|------|-----------|------------|-------------------------------------------------------------------------------------------------------------------------------------------------------------------------------------------------------------------------------------------------------------|------------------------------------------------------------------------|-----------------------------------------------------------------------------------------------------------------------------------------------------------------------------|-------|--------|------|-----------|------------------------------|---------------------------------------|
|                               |                         |      |           |            |                                                                                                                                                                                                                                                             |                                                                        |                                                                                                                                                                             |       |        |      |           |                              | Cognitive Performance Scale, Dementia |
| 20001655                      | Kjeldsen <sup>67</sup>  | 2009 | Covariate | Protective | Patients with HTN and electrocardiographic LVH randomized to losartan-based versus atenolol-based therapy in the Losartan Intervention For Endpoint reduction in hypertension (LIFE) study                                                                  | Cardiovascular death                                                   | Age x Smoking, Smoking, History of AF, History of Stroke or TIA, Sex, Urinary Albumin to Creatinine Ratio, Prior Ischemic Heart Disease, LVH, Creatinine, Glucose, Exercise | 9193  | 54%    | 438  | 66.9 (NR) | mean: 4.8 years              |                                       |
| <b>ARRHYTHMIA – MORBIDITY</b> |                         |      |           |            |                                                                                                                                                                                                                                                             |                                                                        |                                                                                                                                                                             |       |        |      |           |                              |                                       |
| 2330896                       | Cabin <sup>124</sup>    | 1990 | Covariate | Harmful    | Patients without mitral stenosis or prosthetic valves who were referred to the echocardiography laboratory with atrial fibrillation                                                                                                                         | ST segment elevation MI c embolization                                 | Structural Heart Disease, Sex, Left Atrial Size                                                                                                                             | 272   | 9.9%   | 27   | 68 (NR)   | 12 months (mean: 2.75 years) |                                       |
| 10356104                      | Hart <sup>125</sup>     | 1999 | Covariate | Harmful    | Adults with documented sustained or recurrent AF without mitral stenosis or prosthetic cardiac valves who were recruited from inpatient and outpatient facilities, assigned to aspirin 325 mg/d or aspirin plus fixed, low-dose warfarin                    | Incident ischemic stroke                                               | Sex, Prior Stroke or TIA, SBP, History of HTN, Age, Alcohol Intake                                                                                                          | 1853  | 30.40% | 101  | 69 (10)   | mean: 2.0 years              |                                       |
| 12941677                      | Wang <sup>126</sup>     | 2003 | Covariate | Harmful    | Community-based cohort (FRAMINGHAM) with new-onset AF                                                                                                                                                                                                       | Stroke                                                                 | Diabetes, Sex, Prior Stroke or TIA, Age, SBP                                                                                                                                | 868   | 47%    | 111  | 75 (9)    | 5 years (mean: 4.3 years)    |                                       |
| 17099015                      | Shireman <sup>127</sup> | 2006 | Covariate | Harmful    | Elderly patient at least 65 year old with atrial fibrillation who were taking warfarin                                                                                                                                                                      | Major acute bleeding event within 90 days of the hospital discharge    | Anemia, Substance Use, Recent Bleeding Event, Age, Antiplatelet Therapy, Sex, Diabetes                                                                                      | 19875 | 52.50% | 318  | NR        | 90 days                      |                                       |
| 19762550                      | Lip <sup>128</sup>      | 2010 | Covariate | Harmful    | Ambulant and hospitalized patients with AF without mitral stenosis or previous heart valve surgery and who did not use either VKA or heparin at discharge, ≥ 18 years old with an ECG or Holter recording showing atrial fibrillation during the qualifying | Stroke and thromboembolism                                             | Age, Stroke/TIA, CHF/LVD, Diabetes, Sex, HTN, Vascular Disease                                                                                                              | 5333  | 40.80% | 25   | 66 (14)   | 1 year                       |                                       |
| 21324428                      | Mathews <sup>129</sup>  | 2011 | Covariate | Harmful    | Patients with atrial fibrillation who underwent standard two-dimensional, Doppler, and speckle-tracking echocardiography                                                                                                                                    | In-hospital major bleeding associated with acute myocardial infarction | Signs of Heart Failure, Hemoglobin, ST-Segment Changes, Sex, Previous PAD, Diabetes, Warfarin Use, Creatinine, SBP,                                                         | 72313 | 35.3%  | 7810 | 64 (NR)   | Hospitalization period       |                                       |



| HR, Age, Weight             |                        |      |           |                 |                                                                                                                                                                                                                         |                                                                                                                                                          |                                                                                                                                                                                                                                               |      |        |      |            |                        |
|-----------------------------|------------------------|------|-----------|-----------------|-------------------------------------------------------------------------------------------------------------------------------------------------------------------------------------------------------------------------|----------------------------------------------------------------------------------------------------------------------------------------------------------|-----------------------------------------------------------------------------------------------------------------------------------------------------------------------------------------------------------------------------------------------|------|--------|------|------------|------------------------|
| CARDIAC SURGERY – MORBIDITY |                        |      |           |                 |                                                                                                                                                                                                                         |                                                                                                                                                          |                                                                                                                                                                                                                                               |      |        |      |            |                        |
| 1623792                     | Tuman <sup>130</sup>   | 1992 | Covariate | Harmful         | Adult patients undergoing cardiac surgery (cardiac surgery combined with ventricular aneurysmectomy, endocardial mapping, carotid endarterectomy, or intracardiac procedures other than valvular surgery were excluded) | Post-operative morbidity (defined as MI, extended pulmonary assistance, renal insufficiency, serious infection, neurologic abnormalities including coma) | Reoperation, Surgical Procedure, Age, Age of Previous MI, Emergency Surgery, CABG + Valve, Multivalve Procedure, Cerebrovascular Disease, Pulmonary HTN, CHF, LVD, Renal Dysfunction, Sex, Mitral Valve Replacement, Aortic Valve Replacement | 3156 | 34.3%  | 701  | NR         | NR                     |
| 12822622                    | Lim <sup>131</sup>     | 2003 | Covariate | Protective      | Patients undergoing mitral valve repair                                                                                                                                                                                 | Coronary Disease (luminal narrowing of 50%)                                                                                                              | EKG Evidence of Ischemia, Angina, Sex, Hypercholesterolemia, Age                                                                                                                                                                              | 359  | 35%    | NR   | 65 (10)    | Diagnosis              |
| 14583307                    | Huijskes <sup>92</sup> | 2003 | Covariate | Harmful         | Patient who underwent a CABG and/or heart valve operation                                                                                                                                                               | Extended length of stay (ELOS) (care length of stay of at least 3 days or in-hospital death)                                                             | Combined CABG/Mitral Valve, Creatinine, LVEF, Recent MI, Prior Cardiac Surgery, Emergency Procedure, Critical Preoperative State, Failed PCI, Pulmonary HTN, Combined CABG/Aortic Valve, Neurological Dysfunction, Sex, Age, Hemoglobin       | 4855 | 27%    | 1001 | NR         | Hospitalization period |
| STROKE – MORBIDITY          |                        |      |           |                 |                                                                                                                                                                                                                         |                                                                                                                                                          |                                                                                                                                                                                                                                               |      |        |      |            |                        |
| 1527533                     | Hankey <sup>99</sup>   | 1992 | Covariate | Protective      | Transient ischemic attack patients referred to a university hospital without prior stroke                                                                                                                               | Stroke                                                                                                                                                   | Ischemic Heart Disease, PVD, Residual Neurological Signs, TIA, LVH, Carotid and Vertebral-Basilar TIAs, Sex, Age                                                                                                                              | 469  | 32.4%  | 63   | 62.1 (12)  | mean: 4.1 years        |
| OTHER                       |                        |      |           |                 |                                                                                                                                                                                                                         |                                                                                                                                                          |                                                                                                                                                                                                                                               |      |        |      |            |                        |
| 2072767                     | Selker <sup>132</sup>  | 1991 | Covariate | NA <sup>d</sup> | Critical care unit patients whose chief complaint was chest pain or symptoms consistent with possible acute cardiac ischemia who sought medical care                                                                    | Acute ischemia diagnosis (including acute myocardial infarction or unstable angina)                                                                      | EKG T-waves Inverted, EKG ST-segment Changes, Chest or Left Arm Pressure/Pain, Sex, Age, EKG Q waves Present                                                                                                                                  | 3453 | 43%    | 1251 | 62 (NR)    | NR                     |
| 19751624                    | Ngako <sup>133</sup>   | 2009 | Covariate | Protective      | Patients presenting to the emergency room with suspicion of acute coronary syndrome                                                                                                                                     | Acute coronary syndrome                                                                                                                                  | Typical Left Arm/Jaw/Neck Pain, Typical Chest Pain, Epigastric Pain, History of CAD, Dyspnea, Sex                                                                                                                                             | 399  | 49.1%  | 124  | 76.9 (7.4) | 1 month                |
| 20092615                    | Gencer <sup>134</sup>  | 2010 | Covariate | NA <sup>d</sup> | Patients who reported any type of chest pain                                                                                                                                                                            | Diagnosis of CHD (angina pectoris,                                                                                                                       | Sex x Age, Cardiovascular Risk                                                                                                                                                                                                                | 661  | 52.50% | 85   | 55.4       | 1 year                 |

|          |                        |      |           |                 |                                                                                                                                                                                                            |                                                                               |                                                                                                                                                                                                                                                                                                     |        |       |      |             |                        |
|----------|------------------------|------|-----------|-----------------|------------------------------------------------------------------------------------------------------------------------------------------------------------------------------------------------------------|-------------------------------------------------------------------------------|-----------------------------------------------------------------------------------------------------------------------------------------------------------------------------------------------------------------------------------------------------------------------------------------------------|--------|-------|------|-------------|------------------------|
|          |                        |      |           |                 | during visit. The presence of chest pain was ascertained according to the usual practice of each family practitioner.                                                                                      | unstable angina, myocardial infarction)                                       | Factors, History of CVD, Area of Pain, Absence of Tenderness, Duration of Chest Pain, Precipitating with Exertion                                                                                                                                                                                   |        |       |      | (19)        |                        |
| 20603345 | Bosner <sup>135</sup>  | 2010 | Covariate | NA <sup>d</sup> | Patients who presented with chest pain localized on the anterior chest wall in the area between the clavicles who was seen by a primary care physician and subsequently tested for coronary artery disease | Presence of coronary artery disease                                           | Vascular Disease, Pain Worse During Exercise, Pain Not Reproducible By Palpation, Patient Assumes Pain is Cardiac, Age x Sex, CHF, Diabetes, Stinging Pain, Localized Muscle Tension, Cough                                                                                                         | 1249   | 43.9% | 180  | 59 (13.9)   | NA (case control)      |
| 10571089 | Anyanwu <sup>136</sup> | 1999 | Covariate | Harmful         | All patients registered on the national waiting list for heart transplantation in the UK                                                                                                                   | Thirty-day graft survival                                                     | Previous Sternotomy, Donor Age, Donor Inotropic Support, Donor with Diabetes, Sex of Donor, History of Donor Drug Abuse, Ischemic time, Sex x BSA, Pre-op Circulatory Support, Pre-op Ventilatory Support, Pulmonary Vascular Resistance, Donor to Recipient BSA Ratio, Recipient Age, Retransplant | 377    | 17%   | 332  | 49 (10)     | 30 days                |
| 16219658 | Pocock <sup>4</sup>    | 2006 | Covariate | Protective      | Patients with chronic heart failure (CHF)                                                                                                                                                                  | Composite of cardiovascular (CV) death and heart failure (HF) hospitalization | Diabetes, Prior Heart Failure Hospitalization, NYHA Class, Age, Cardiomegaly, CHF, Pulmonary Edema, Bundle Branch Block, Pulmonary Crackles, Dependent Edema, Dyspnea, Mitral Regurgitation, AF, LVEF, Previous MI, DBP, Smoking, HR, BMI, Sex, Candesartan vs Placebo                              | 7599   | 68.4% | 2460 | 65.5 (10.9) | median: 3.17 years     |
| 21537001 | Haines <sup>137</sup>  | 2011 | Covariate | Harmful         | Patients undergoing implantable cardioverter-defibrillator implantation                                                                                                                                    | In-hospital complication (mortality or any complications)                     | Previous Implantable Cardioverter-Defibrillator, Defibrillator Type, NYHA Class, Other Admission, Previous Valvular Surgery, Sex, BUN, Chronic Lung Disease, AF or Flutter, Age                                                                                                                     | 134069 | 25.9% | 8589 | NR          | Hospitalization period |

|          |                         |      |           |                 |                                                                                                                                        |                                                  |                                                                                                                                                                                                                                                                                                                                                                             |        |        |      |             |                             |
|----------|-------------------------|------|-----------|-----------------|----------------------------------------------------------------------------------------------------------------------------------------|--------------------------------------------------|-----------------------------------------------------------------------------------------------------------------------------------------------------------------------------------------------------------------------------------------------------------------------------------------------------------------------------------------------------------------------------|--------|--------|------|-------------|-----------------------------|
| 22114101 | O'Connor <sup>8</sup>   | 2012 | Covariate | Protective      | Patients enrolled in the HF-ACTION study with a NYHF class II-IV, LVEF ≤ 35%                                                           | All-cause death or hospitalization               | KCCQ Symptom Stability, Serum Urea Nitrogen, Exercise Duration on CPX Test, Sex                                                                                                                                                                                                                                                                                             | 2331   | 28%    | 1555 | NR          | median: 2.5 years           |
| 22456478 | Bouleti <sup>138</sup>  | 2012 | Covariate | NA <sup>h</sup> | Patients who underwent percutaneous mitral commissurotomy with good results                                                            | Poor late functional results                     | Age x Mitral Valve Area, Final Mean Mitral Gradient, Valve Calcification x Sex, AF x NYHA Class                                                                                                                                                                                                                                                                             | 609    | 81%    | 309  | 49 (14)     | 20 years (mean: 10.7 years) |
| 22155702 | Holme <sup>139</sup>    | 2012 | Covariate | Harmful         | Patients in the Simvastatin and Ezetimibe in Aortic Stenosis trial with asymptomatic mild-to-moderate aortic stenosis                  | Mortality                                        | Age, Sex, Smoking, LVMI, Bilirubin, HR, CRP                                                                                                                                                                                                                                                                                                                                 | 772    | 38%    | 78   | 67.6 (9.6)  | 4 years (mean: 4.8 years)   |
| 21871277 | Weiss <sup>140</sup>    | 2011 | Covariate | Harmful         | Patients who underwent orthotopic heart transplantation (OHT)                                                                          | Mortality                                        | Bilirubin, Race, Creatinine Clearance, HF Etiology, Ventricular Assist Device, Age                                                                                                                                                                                                                                                                                          | 17079  | 23.7%  | NR   | 52.1 (11.9) | 1 year                      |
| 15854958 | Passman <sup>141</sup>  | 2005 | Covariate | Protective      | Cancer patients who were in sinus rhythm before surgery before undergoing major non-cardiac thoracic surgery                           | Post-operative atrial fibrillation               | Age, Sex, HR                                                                                                                                                                                                                                                                                                                                                                | 856    | 45.1%  | 147  | 64.6 (10.6) | Hospitalization period      |
| 17544079 | Rogers <sup>142</sup>   | 2007 | Covariate | Harmful         | Patients from Veteran's Administration medical centers and private sector hospitals who underwent major general or vascular procedures | Post-operative deep venous thromboembolism       | Respiratory and Hemic vs Endocrine, Thoracoabdominal vs Endocrine, Stomach/Intestines vs Endocrine, Mouth/Palate vs Endocrine, Aneurysm vs Endocrine, Work RVU, ASA Physical Status, Disseminated Cancer, Ventilator Dependent, Hernia vs Endocrine, Chemotherapy for Malignancy, Sodium, Transfusion, Emergency, Wound Class, Sex, Hematocrit, Bilirubin, Dyspnea, Albumin | 182783 | 19.8%  | 1162 | 60.3 (14.3) | 30 days                     |
| 20453069 | Decousus <sup>143</sup> | 2011 | Covariate | Protective      | Patients who were admitted to the hospital (duration > 3 days) for an acute medical illness                                            | In-hospital bleeding within 14 days of admission | Active Ulcer, Prior Bleeding, Platelet Count, Age, Hepatic Failure, Renal Failure, ICU, Catheter, Cancer, Rheumatic Disease, Sex                                                                                                                                                                                                                                            | 9388   | 50.60% | 198  | NR          | Hospitalization period      |
| 21818020 | Cook <sup>144</sup>     | 2011 | Covariate | Harmful         | Patients 16 years old or older with an ICD-9 code                                                                                      | Blunt cerebrovascular                            | Cervical Spinal Cord Surgery, Cerebellar or                                                                                                                                                                                                                                                                                                                                 | 349121 | NR     | 471  | NR          | Diagnosis                   |

|          |                          |      |           |            |                                                                                                                  |                                                                |                                                                                                                                                                                                                                                                                                                                    |       |        |      |             |                        |
|----------|--------------------------|------|-----------|------------|------------------------------------------------------------------------------------------------------------------|----------------------------------------------------------------|------------------------------------------------------------------------------------------------------------------------------------------------------------------------------------------------------------------------------------------------------------------------------------------------------------------------------------|-------|--------|------|-------------|------------------------|
|          |                          |      |           |            | consistent with blunt cerebrovascular trauma                                                                     | injury                                                         | Brainstem Injury, Thoracic Spinal Cord Injury, Maxillary or Malar Fracture, Chest Abbreviated Injury Scale, Trauma Mortality Prediction Model, Cervical Spine Fracture/Dislocation, Mandible Fracture, Age, Sex, Traumatic Intracranial Hemorrhage                                                                                 |       |        |      |             |                        |
| 14980900 | Rohrig <sup>145</sup>    | 2004 | Covariate | Protective | Patients undergoing non-cardiac surgery                                                                          | Operative cardiovascular events (CVE)                          | Major Vascular Surgery, Gastrointestinal Surgery, Hematopoietic/Lymphatic Surgery, Neurosurgery, Thoracic Surgery, Valve Disease, Carotid Artery Stenosis, Hypovolemia, Arterial HTN, Chronic Renal Failure, Emergency Surgery, CABG, Arrhythmia, Sex, Age                                                                         | 29437 | 49.4%  | 5249 | 52.7 (18.4) | Hospitalization period |
| 17544078 | Davenport <sup>146</sup> | 2007 | Covariate | Protective | Patients from VA medical centers and private-sector hospitals who underwent major general or vascular procedures | Postoperative cardiac adverse events                           | ASA Physical Status, Age, Type of Operation, Work RVU, Creatinine, Emergency, WBC, Weight Loss, CHF, Sepsis, Ascites, Bleeding Disorder, Platelet Count, Specialty, Impaired Sensorium, Wound Class, CVA/Stroke with Neurological Deficit, Sex, Dyspnea, Albumin                                                                   | 91403 | 19.80% | 1181 | 60.3 (14.3) | 30 days                |
| 21217144 | Verheugt <sup>147</sup>  | 2011 | Covariate | Protective | Inception cohort of adults with congenital heart disease followed from the age of 18                             | Adult-onset infective endocarditis up to 40 or 60 years of age | Pulmonary Atresia, Transposition of Great Arteries, Ventricular Septal Defect, Bicuspid Aortic Valve, Univentricular Heart/Double Inlet Left Ventricle, Infective Endocarditis, Other Congenital Heart Defect, Aortic Stenosis, Atrioventricular Septal Defect, Tetralogy of Fallot, Marfan Syndrome, CVA/TIA, Aortic Coarctation, | 10210 | 51%    | 233  | NR          | mean: 18.9 years       |

|          |                              |      |           |            |                                                                                                                                                           |                                                                                                                                                                                                           |                                                                                                                                              |      |       |     |              |                        |
|----------|------------------------------|------|-----------|------------|-----------------------------------------------------------------------------------------------------------------------------------------------------------|-----------------------------------------------------------------------------------------------------------------------------------------------------------------------------------------------------------|----------------------------------------------------------------------------------------------------------------------------------------------|------|-------|-----|--------------|------------------------|
|          |                              |      |           |            |                                                                                                                                                           |                                                                                                                                                                                                           | Ebstein Malformation, Multiple Congenital Heart Defects, Pulmonary Stenosis, Sex, Arrhythmia                                                 |      |       |     |              |                        |
| 21051669 | Calvillo-King <sup>148</sup> | 2010 | Covariate | Harmful    | Medicare beneficiaries underwent carotid endarterectomy and were otherwise asymptomatic                                                                   | Death or nonfatal stroke within 30 days of surgery                                                                                                                                                        | Severe Disability, Race, Stenosis, CHF, CAD, VHD, Distant Stroke or TIA, Sex                                                                 | 6553 | 45.1% | 197 | 74.5 (6.6)   | 30 days                |
| 20728962 | Barrett <sup>149</sup>       | 2011 | Covariate | Harmful    | Patients presenting in the emergency department with symptomatic atrial fibrillation                                                                      | 30-day adverse event (ED return visit, unscheduled hospitalization, cardiovascular complication, or death)                                                                                                | Smoking, Inadequate Ventricular Rate Control, Dyspnea, Beta Blockers, CHF, Edema, HTN, Age, Sex, COPD, Diuretic Use, Palpitations            | 832  | 41.1% | 651 | 63.6 (NR)    | 30 days                |
| 20351233 | Eichinger <sup>150</sup>     | 2010 | Covariate | Protective | Patients admitted for first unprovoked venous thromboembolism                                                                                             | Risk of recurrent VTE after discontinuation of anticoagulation                                                                                                                                            | PE vs Distal Thrombosis, Proximal vs Distal Thrombosis, Sex, D-Dimer                                                                         | 929  | 39.5% | 176 | NR           | 43.3 months            |
| 18922710 | Yamaki <sup>151</sup>        | 2009 | Covariate | Protective | Patients with confirmed cardiopulmonary stable pulmonary embolism who were prospectively evaluated using bilateral lower extremity compression ultrasound | Recurrence of symptomatic venous thromboembolism (VTE) and fatal events                                                                                                                                   | Sex, History of DVT, Cancer, Presence of DVT, Inadequate Anticoagulation, Presence of Proximal DVT, Leg Symptoms                             | 203  | 61.6% | 118 | 62.8 (15.9)  | 12 months              |
| 19766355 | Sun <sup>152</sup>           | 2009 | Covariate | Protective | Patients aged 60 or older with an emergency department discharge diagnosis of syncope                                                                     | Serious clinical event that occurred during the 30- day period after the initial ED evaluation (death, arrhythmias, MI, a new diagnosis of structural heart disease thought to be related to syncope, PE) | Near-Syncope, Abnormal EKG, Troponin, Age, Arrhythmia, Sex, Triage SBP                                                                       | 2584 | 54%   | 173 | NR           | 30 days                |
| 19486721 | Cruz-Gonzalez <sup>153</sup> | 2009 | Covariate | Harmful    | Patients with moderate or severe mitral stenosis (MS) patients who underwent percutaneous mitral valvuloplasty (PMV)                                      | Percutaneous mitral valvuloplasty (PMV) success                                                                                                                                                           | Mitral Valve Area, Mitral Regurgitation, Sex, Echo Score, NYHA Class, Age                                                                    | 800  | 81.9% | 544 | 54.9 (15.26) | Hospitalization period |
| 19546391 | Monin <sup>154</sup>         | 2009 | Covariate | Harmful    | Patients with asymptomatic aortic stenosis                                                                                                                | Death or aortic valve replacement necessitated by symptoms or by a positive exercise test                                                                                                                 | Peak Velocity, Sex, BNP, Three-Leaflet Valve, Calcification Score, Transaortic Mean Pressure Gradient, Aortic Valve Area, Indexed Valve Area | 104  | 34%   | 62  | 72 (NR)      | 2 years                |
| 18573589 | Nishiuchi <sup>155</sup>     | 2008 | Covariate | Protective | Patients who experienced an out-of-                                                                                                                       | Survival                                                                                                                                                                                                  | Witness, CPR to Hospital Arrival Time,                                                                                                       | 1028 | 22.8% | 202 | NR           | 1 month                |

|          |                         |      |           |            |                                                                                                                          |                                                                                                                                                                                 |                                                                                                                                                                                                                                            |       |       |      |              |                        |
|----------|-------------------------|------|-----------|------------|--------------------------------------------------------------------------------------------------------------------------|---------------------------------------------------------------------------------------------------------------------------------------------------------------------------------|--------------------------------------------------------------------------------------------------------------------------------------------------------------------------------------------------------------------------------------------|-------|-------|------|--------------|------------------------|
|          |                         |      |           |            | hospital cardiac arrest                                                                                                  |                                                                                                                                                                                 | Ambulance Call to CPR Time, Sex, Age, Ambulance Call to Defibrillation Time                                                                                                                                                                |       |       |      |              |                        |
| 16525500 | Kim <sup>156</sup>      | 2006 | Covariate | Harmful    | Patients with newly diagnosed acute leukemia                                                                             | Fatal intracranial hemorrhage                                                                                                                                                   | Sex, Leukemia, WBC, Prothombin Time, Platelets, Promyelocytic Leukemia, Activated Partial Thromboplastin Time, Age, Hemorrhage Score                                                                                                       | 792   | 68.3% | 41   | 42 (17)      | mean: 3.8 years        |
| 16520853 | Ivanov <sup>157</sup>   | 2006 | Covariate | Harmful    | Patients who underwent cardiac surgery                                                                                   | Adverse event (operative death, a perioperative MI defined by EKG and enzymatic criteria, low cardiac output syndrome, a perioperative stroke, new postoperative renal failure) | Priority Status, CABG, LVEF, Renal Insufficiency, Other Pathology, Age, Sex, CHF, Recent MI, Left Main Disease, PVD, Triple Vessel Disease, Complex Valve, Diabetes, HTN                                                                   | 12683 | 27%   | 1243 | 61 (12)      | Hospitalization period |
| 16308250 | Yuan <sup>158</sup>     | 2006 | Covariate | Protective | Population of patients enrolled at routine visit                                                                         | Vertigo                                                                                                                                                                         | Triglycerides, SBP, CVD, DBP, Sex, Age, Cholesterol, Fasting Blood Glucose                                                                                                                                                                 | 200   | 54.5% | 100  | 58.2 (11.26) | NA (case control)      |
| 16020800 | Aujesky <sup>159</sup>  | 2005 | Covariate | Protective | Patients with pulmonary embolism                                                                                         | Mortality                                                                                                                                                                       | Age, Altered Mental Status, Cancer, SBP, Pulse, Arterial Oxygen Saturation, Temperature, Respiratory Rate, HF, Chronic Lung Disease, Sex                                                                                                   | 10354 | 60.4% | 953  | NR           | 30 days                |
| 9002560  | Karlson <sup>160</sup>  | 1997 | Covariate | Protective | Patients with chest pain/suspected acute myocardial infarction in the emergency department (ED)                          | Mortality                                                                                                                                                                       | History of CHF, History of Diabetes, Loss of Consciousness, Unspecific Symptoms, Signs of Acute Ischemia, ST Elevation on EKG, Acute Severe CHF, History of HTN, Age, Sex, Initial Degree of Suspicion of Infarction, Normal Admission EKG | 5362  | 45%   | 604  | 63 (NR)      | 1 year                 |
| 17380222 | McDonald <sup>161</sup> | 2007 | Covariate | Protective | Patients with non-traumatic chest pain or symptoms suggestive of ischemic heart disease admitted to emergency department | Primary end point: death, nonfatal myocardial infarction or revascularization                                                                                                   | ST Deviation on EKG, Sex, Acetylsalicylic Acid Taken Before ER, Risk Factors for CAD, Prior CHF                                                                                                                                            | 1054  | 44%   | 141  | 61 (16)      | 30 days                |

<sup>a</sup> Directionality of the predictive effect of female sex cannot be determined without considering the following interaction term with sex:  $\log(\text{age})^2 \times \text{female}$ , diabetes  $\times$  female, LVH  $\times$  male,  $\log(\text{age}) \times \text{female}$ .

<sup>b</sup> Directionality cannot be determined for this model without considering the following interaction term with sex: diabetes  $\times$  female.

- <sup>c</sup> Directionality cannot be determined for this model without considering the following interaction terms with sex:  $\log(\text{age}) \times \text{female}$ , diabetes  $\times$  female.
- <sup>d</sup> Directionality cannot be determined for this model because sex is included in this model in an interaction term only: age  $\times$  sex.
- <sup>e</sup> Directionality cannot be determined for this model without considering the following interaction terms with sex:  $\log(\text{age})^2 \times \text{female}$ , diabetes  $\times$  female,  $\log(\text{age}) \times \text{female}$ .
- <sup>f</sup> Directionality cannot be determined for this model because sex is included in this model in an interaction term only: sex  $\times$  waist circumference.
- <sup>g</sup> Directionality cannot be determined for this model without considering the following interaction terms with sex: female  $\times$  BSA function, female  $\times$  mitral valve repair, female  $\times$  mitral valve replacement.
- <sup>h</sup> Directionality cannot be determined for this model because sex is included in this model in an interaction term only: valve calcification  $\times$  sex.

## References

1. Bouvy ML, Heerdink ER, Leufkens HG, Hoes AW. Predicting mortality in patients with heart failure: a pragmatic approach. *Heart*. 2003;89:605-609.
2. Adlam D, Silcocks P, Sparrow N. Using BNP to develop a risk score for heart failure in primary care. *European Heart Journal*. 2005;26:1086-1093.
3. Alehagen U, Lindstedt G, Levin LA, Dahlstrom U. The risk of cardiovascular death in elderly patients with possible heart failure. Results from a 6-year follow-up of a Swedish primary care population. *International Journal of Cardiology*. 2005;100:17-27.
4. Pocock SJ, Wang D, Pfeffer MA, Yusuf S, McMurray JJ, Swedberg KB, Ostergren J, Michelson EL, Pieper KS, Granger CB. Predictors of mortality and morbidity in patients with chronic heart failure. *European Heart Journal*. 2006;27:65-75.
5. Levy WC, Mozaffarian D, Linker DT, Sutradhar SC, Anker SD, Cropp AB, Anand I, Maggioni A, Burton P, Sullivan MD, Pitt B, Poole-Wilson PA, Mann DL, Packer M. The Seattle Heart Failure Model: prediction of survival in heart failure. *Circulation*. 2006;113:1424-1433.
6. Rassi A, Jr., Rassi A, Little WC, Xavier SS, Rassi SG, Rassi GG, Hasslocher-Moreno A, Sousa AS, Scanavacca MI. Development and validation of a risk score for predicting death in Chagas' heart disease. *New England Journal of Medicine*. 2006;355:799-808.
7. Miura K, Matsumori A, Nasermoaddeli A, Soyama Y, Morikawa Y, Sakurai M, Kitabatake A, Nagai M, Inaba Y, Nakagawa H. Prognosis and prognostic factors in patients with idiopathic dilated cardiomyopathy in Japan. *Circulation: Official Journal of the Japanese Circulation Society*. 2008;72:343-348.
8. O'Connor CM, Whellan DJ, Wojdyla D, Leifer E, Clare RM, Ellis SJ, Fine LJ, Fleg JL, Zannad F, Keteyian SJ, Kitzman DW, Kraus WE, Rendall D. Factors related to morbidity and mortality in patients with chronic heart failure with systolic dysfunction: the HF-ACTION predictive risk score model. *Circulation: Heart Failure*. 2012;5:63-71.
9. Hannan EL, Arani DT, Johnson LW, Kemp HG, Jr., Lukacik G. Percutaneous transluminal coronary angioplasty in New York State. Risk factors and outcomes. *JAMA*. 1992;268:3092-3097.
10. O'Connor GT, Plume SK, Olmstead EM, Coffin LH, Morton JR, Maloney CT, Nowicki ER, Levy DG, Tryzelaar JF, Hernandez F, Adrian L, Casey KJ, Bundy D, Soule DN, Marrin CAS, Nugent WC, Charlesworth DC, Clough R, Katz S, Leavitt BJ, Wennberg JE. Multivariate prediction of in-hospital mortality associated with coronary artery bypass graft surgery. Northern New England Cardiovascular Disease Study Group. *Circulation*. 1992;85:2110-2118.
11. Wong DT, Cheng DC, Kustra R, Tibshirani R, Karski J, Carroll-Munro J, Sandler A. Risk factors of delayed extubation, prolonged length of stay in the intensive care unit, and mortality in patients undergoing coronary artery bypass graft with fast-track cardiac anesthesia: a new cardiac risk score. *Anesthesiology*. 1999;91:936-944.
12. Moscucci M, Kline-Rogers E, Share D, O'Donnell M, Maxwell-Edward A, Meengs WL, Kraft P, DeFranco AC, Chambers JL, Patel K, McGinnity JG, Eagle KA. Simple bedside additive tool for prediction of in-hospital mortality after percutaneous coronary interventions. *Circulation*. 2001;104:263-268.
13. Zaroff JG, diTommaso DG, Barron HV. A risk model derived from the National Registry of Myocardial Infarction 2 database for predicting mortality after coronary artery bypass grafting during acute myocardial infarction. *American Journal of Cardiology*. 2002;90:1-4.



14. Wu Y, Grunkemeier GL, Handy JR, Jr. Coronary artery bypass grafting: are risk models developed from on-pump surgery valid for off-pump surgery? *Journal of Thoracic and Cardiovascular Surgery*. 2004;127:174-178.
15. Wu C, Hannan EL, Walford G, Ambrose JA, Holmes DR Jr, King SB 3<sup>rd</sup>, Clark LT, Katz S, Sharma S, Jones RH. A risk score to predict in-hospital mortality for percutaneous coronary interventions. *Journal of the American College of Cardiology*. 2006;47:654-660.
16. Hannan EL, Wu C, Bennett EV, Carlson RE, Culliford AT, Gold JP, Higgins RS, Isom OW, Smith CR, Jones RH. Risk stratification of in-hospital mortality for coronary artery bypass graft surgery. *Journal of the American College of Cardiology*. 2006;47:661-668.
17. Mehta RH, Grab JD, O'Brien SM, Glower DD, Haan CK, Gammie JS, Peterson ED, Society of Thoracic Surgeons National Cardiac Database Investigators. Clinical characteristics and in-hospital outcomes of patients with cardiogenic shock undergoing coronary artery bypass surgery: insights from the Society of Thoracic Surgeons National Cardiac Database. *Circulation*. 2008;117:876-885.
18. de Mulder M, Gitt A, van Domburg R, Hochadel M, Seabra-Gomes R, Serruys PW, Silber S, Weidinger F, Wijns W, Zeymer U, Hamm C, Boersma E. EuroHeart score for the evaluation of in-hospital mortality in patients undergoing percutaneous coronary intervention. *European Heart Journal*. 2011;32:1398-1408.
19. Hamburger JN, Walsh SJ, Khurana R, Ding L, Gao M, Humphries KH, Carere R, Fung AY, Mildenerger RR, Simkus GJ, Webb JG, Buller CE. Percutaneous coronary intervention and 30-day mortality: the British Columbia PCI risk score. *Catheterization and Cardiovascular Interventions: Official Journal of the Society for Cardiac Angiography & Interventions*. 2009;74:377-385.
20. Grzybowski M, Zalenski RJ, Ross MA, Bock B. A prediction model for prehospital triage of patients with suspected cardiac ischemia. *Journal of Electrocardiology*. 2000;33:253-258.
21. Williams BA, Wright RS, Murphy JG, Brilakis ES, Reeder GS, Jaffe AS. A new simplified immediate prognostic risk score for patients with acute myocardial infarction. *Emergency Medicine Journal: EMJ*. 2006;23:186-192.
22. de Boer SP, Barnes EH, Westerhout CM, Simes RJ, Granger CB, Kastrati A, Widimsky P, de Boer MJ, Zijlstra F, Boersma E. High-risk patients with ST-elevation myocardial infarction derive greatest absolute benefit from primary percutaneous coronary intervention: results from the Primary Coronary Angioplasty Trialist versus thrombolysis (PCAT)-2 collaboration. *American Heart Journal*. 2011;161:500-507.
23. Boersma E, Pieper KS, Steyerberg EW, Wilcox RG, Chang WC, Lee KL, Akkerhuis KM, Harrington RA, Deckers JW, Armstrong PW, Lincoff AM, Califf RM, Topol EJ, Simoons ML. Predictors of outcome in patients with acute coronary syndromes without persistent ST-segment elevation. Results from an international trial of 9461 patients. The PURSUIT Investigators. *Circulation*. 2000;101:2557-2567.
24. Mehran R, Pocock SJ, Nikolsky E, Clayton T, Dangas GD, Kirtane AJ, Parise H, Fahy M, Manoukian SV, Feit F, Ohman ME, Witzenbichler B, Guagliumi G, Lansky AJ, Stone GW. A risk score to predict bleeding in patients with acute coronary syndromes. *Journal of the American College of Cardiology*. 2010;55:2556-2566.
25. Roe MT, Chen AY, Thomas L, Wang TY, Alexander KP, Hammill BG, Gibler WB, Ohman EM, Peterson ED. Predicting long-term mortality in older patients after non-ST-segment elevation myocardial infarction: the CRUSADE long-term mortality model and risk score. *American Heart Journal*. 2011;162:875-883.

26. Marchioli R, Avanzini F, Barzi F, Chieffo C, Di Castelnuovo A, Franzosi MG, Geraci E, Maggioni AP, Marfisi RM, Mininni N, Nicolosi GL, Santini M, Schweiger C, Tavazzi L, Tognoni G, Valagussa F, GISSI-Prevenzione Investigators. Assessment of absolute risk of death after myocardial infarction by use of multiple-risk-factor assessment equations: GISSI-Prevenzione mortality risk chart. *European Heart Journal*. 2001;22:2085-2103.
27. Elhendy A, Mahoney DW, McCully RB, Seward JB, Burger KN, Pellikka PA. Use of a scoring model combining clinical, exercise test, and echocardiographic data to predict mortality in patients with known or suspected coronary artery disease. *American Journal of Cardiology*. 2004;93:1223-1228.
28. Cortigiani L, Bigi R, Gregori D, Sicari R, Picano E. Prognostic value of a multiparametric risk score in patients undergoing dipyridamole stress echocardiography. *American Journal of Cardiology*. 2005;96:529-532.
29. Clayton TC, Lubsen J, Pocock SJ, Voko Z, Kirwan BA, Fox KA, Poole-Wilson PA. Risk score for predicting death, myocardial infarction, and stroke in patients with stable angina, based on a large randomised trial cohort of patients. *BMJ*. 2005;331:869.
30. Rexus H, Brandrup-Wognsen G, Nilsson J, Oden A, Jeppsson A. A simple score to assess mortality risk in patients waiting for coronary artery bypass grafting. *Annals of Thoracic Surgery*. 2006;81:577-582.
31. Anderson JL, Ronnow BS, Horne BD, Carlquist JF, May HT, Bair TL, Jensen KR, Muhlestein JB, Intermountain Heart Collaborative Study Group. Usefulness of a complete blood count-derived risk score to predict incident mortality in patients with suspected cardiovascular disease. *American Journal of Cardiology*. 2007;99:169-174.
32. Yap YG, Duong T, Bland M, Malik M, Torp-Pedersen C, Kober L, Connolly SJ, Gallagher MM, Camm AJ. Potential demographic and baseline variables for risk stratification of high-risk post-myocardial infarction patients in the era of implantable cardioverter-defibrillator--a prognostic indicator. *International Journal of Cardiology*. 2008;126:101-107.
33. Singh M, Rihal CS, Lennon RJ, Spertus J, Rumsfeld JS, Holmes DR, Jr. Bedside estimation of risk from percutaneous coronary intervention: the new Mayo Clinic risk scores. *Mayo Clinic Proceedings*. 2007;82:701-708.
34. Shahian DM, O'Brien SM, Filardo G, Ferraris VA, Haan CK, Rich JB, Normand SL, DeLong ER, Shewan CM, Dokholyan RS, Peterson ED, Edwards FH, Anderson RP, Society of Thoracic Surgeons Quality Measurement Task Force. The Society of Thoracic Surgeons 2008 cardiac surgery risk models: part 3--valve plus coronary artery bypass grafting surgery. *Annals of Thoracic Surgery*. 2009;88:S43-62.
35. Singh M, Holmes DR, Lennon RJ, Rihal CS. Development and validation of risk adjustment models for long-term mortality and myocardial infarction following percutaneous coronary interventions. *Circulation: Cardiovascular Interventions*. 2010;3:423-430.
36. Hubbard BL, Gibbons RJ, Lapeyre AC, 3rd, Zinsmeister AR, Clements IP. Identification of severe coronary artery disease using simple clinical parameters. *Archives of Internal Medicine*. 1992;152:309-312.
37. Morise AP, Haddad WJ, Beckner D. Development and validation of a clinical score to estimate the probability of coronary artery disease in men and women presenting with suspected coronary disease. *American Journal of Medicine*. 1997;102:350-356.
38. Selker HP, Griffith JL, Beshansky JR, Schmid CH, Califf RM, D'Agostino RB, Laks MM, Lee KL, Maynard C, Selvester RH, Wagner GS, Weaver WD. Patient-specific predictions of

outcomes in myocardial infarction for real-time emergency use: a thrombolytic predictive instrument. *Annals of Internal Medicine*. 1997;127:538-556.

39. West MJ, White HD, Simes RJ, Kirby A, Watson JD, Anderson NE, Hankey GJ, Wonders S, Hunt D, Tonkin AM. Risk factors for non-haemorrhagic stroke in patients with coronary heart disease and the effect of lipid-modifying therapy with pravastatin. *Journal of Hypertension*. 2002;20:2513-2517.
40. Charlesworth DC, Likosky DS, Marrin CA, Maloney CT, Quinton HB, Morton JR, Leavitt BJ, Clough RA, O'Connor GT, Northern New England Cardiovascular Disease Study Group. Development and validation of a prediction model for strokes after coronary artery bypass grafting. *Annals of Thoracic Surgery*. 2003;76:436-443.
41. Sadanandan S, Cannon CP, Gibson CM, Murphy SA, DiBattiste PM, Braunwald E, TIMI Study Group. A risk score to estimate the likelihood of coronary artery bypass surgery during the index hospitalization among patients with unstable angina and non-ST-segment elevation myocardial infarction. *Journal of the American College of Cardiology*. 2004;44:799-803.
42. Fowler VG, Jr., O'Brien SM, Muhlbaier LH, Corey GR, Ferguson TB, Peterson ED. Clinical predictors of major infections after cardiac surgery. *Circulation*. 2005;112:358-365.
43. Antunes PE, de Oliveira JF, Antunes MJ. Risk-prediction for postoperative major morbidity in coronary surgery. *European Journal of Cardio-thoracic Surgery: Official Journal of the European Association for Cardio-thoracic Surgery*. 2009;35:760-767.
44. Subherwal S, Bach RG, Chen AY, Gage BF, Rao SV, Newby LK, Wang TY, Gibler WB, Ohman EM, Roe MT, Pollack CV Jr, Peterson ED, Alexander KP. Baseline risk of major bleeding in non-ST-segment-elevation myocardial infarction: the CRUSADE (Can Rapid risk stratification of Unstable angina patients Suppress ADverse outcomes with Early implementation of the ACC/AHA Guidelines) Bleeding Score. *Circulation*. 2009;119:1873-1882.
45. Mehta RH, Sheng S, O'Brien SM, Grover FL, Gammie JS, Ferguson TB, Peterson ED, Society of Thoracic Surgeons National Cardiac Surgery Database Investigators. Reoperation for bleeding in patients undergoing coronary artery bypass surgery: incidence, risk factors, time trends, and outcomes. *Circulation: Cardiovascular Quality and Outcomes*. 2009;2:583-590.
46. Mehran R, Pocock S, Nikolsky E, Dangas GD, Clayton T, Claessen BE, Caixeta A, Feit F, Manoukian SV, White H, Bertrand M, Ohman EM, Parise H, Lansky AJ, Lincoff AM, Stone GW. Impact of bleeding on mortality after percutaneous coronary intervention results from a patient-level pooled analysis of the REPLACE-2 (randomized evaluation of PCI linking angiomas to reduced clinical events), ACUITY (acute catheterization and urgent intervention triage strategy), and HORIZONS-AMI (harmonizing outcomes with revascularization and stents in acute myocardial infarction) trials. *JACC: Cardiovascular Interventions*. 2011;4:654-664.
47. Podolecki TS, Lenarczyk RK, Kowalczyk JP, Mazurek MH, Swiatkowski AM, Chodor PK, Pruszkowska-Skrzep PI, Sedkowska AA, Polonski L, Kalarus ZF. The risk of stroke in patients with acute myocardial infarction treated invasively. *Coronary Artery Disease*. 2012;23:9-15.
48. Magovern JA, Sakert T, Magovern GJ, Benckart DH, Burkholder JA, Liebler GA, Magovern GJ Sr. A model that predicts morbidity and mortality after coronary artery bypass graft surgery. *Journal of the American College of Cardiology*. 1996;28:1147-1153.
49. Fortescue EB, Kahn K, Bates DW. Development and validation of a clinical prediction rule for major adverse outcomes in coronary bypass grafting. *American Journal of Cardiology*. 2001;88:1251-1258.

50. Grayson AD, Moore RK, Jackson M, Rathore S, Sastry S, Gray TP, Schofield I, Chauhan A, Ordoubadi FF, Prendergast B, Stables RH, North West Quality Improvement Programme in Cardiac Interventions. Multivariate prediction of major adverse cardiac events after 9914 percutaneous coronary interventions in the north west of England. *Heart*. 2006;92:658-663.
51. Zhang M, Li J, Cai YM, Ma H, Xiao JM, Liu J, Zhao L, Guo T, Han MH. A risk-predictive score for cardiogenic shock after acute myocardial infarction in Chinese patients. *Clinical Cardiology*. 2007;30:171-176.
52. Santos ES, Timerman A, Baltar VT, Castillo MT, Pereira MP, Minuzzo L, Piegas LS. Dante Pazzanese risk score for non-st-segment elevation acute coronary syndrome. *Arquivos Brasileiros de Cardiologia*. 2009;93:343-351, 336-344.
53. Chen SL, Chen JP, Mintz G, Xu B, Kan J, Ye F, Zhang J, Sun X, Xu Y, Jiang Q, Zhang A, Stone GW. Comparison between the NERS (New Risk Stratification) score and the SYNTAX (Synergy between Percutaneous Coronary Intervention with Taxus and Cardiac Surgery) score in outcome prediction for unprotected left main stenting. *JACC: Cardiovascular Interventions*. 2010;3:632-641.
54. Anderson KM, Odell PM, Wilson PW, Kannel WB. Cardiovascular disease risk profiles. *American Heart Journal*. 1991;121:293-298.
55. Wolf PA, D'Agostino RB, Belanger AJ, Kannel WB. Probability of stroke: a risk profile from the Framingham Study. *Stroke*. 1991;22:312-318.
56. D'Agostino RB, Wolf PA, Belanger AJ, Kannel WB. Stroke risk profile: adjustment for antihypertensive medication. The Framingham Study. *Stroke*. 1994;25:40-43.
57. Wilson PW, D'Agostino RB, Levy D, Belanger AM, Silbershatz H, Kannel WB. Prediction of coronary heart disease using risk factor categories. *Circulation*. 1998;97:1837-1847.
58. Kannel WB, D'Agostino RB, Silbershatz H, Belanger AJ, Wilson PW, Levy D. Profile for estimating risk of heart failure. *Archives of Internal Medicine*. 1999;159:1197-1204.
59. Qureshi AI, Janardhan V, Bennett SE, Luft AR, Hopkins LN, Guterman LR. Who should be screened for asymptomatic carotid artery stenosis? Experience from the Western New York Stroke Screening Program. *Journal of Neuroimaging: Official Journal of the American Society of Neuroimaging*. 2001;11:105-111.
60. Lumley T, Kronmal RA, Cushman M, Manolio TA, Goldstein S. A stroke prediction score in the elderly: validation and Web-based application. *Journal of Clinical Epidemiology*. 2002;55:129-136.
61. Russell MW, Taylor DC, Cummins G, Huse DM. Use of managed care claims data in the risk assessment of venous thromboembolism in outpatients. *American Journal of Managed Care*. 2002;8:S3-9.
62. Ciampi A, Courteau J, Niyonsenga T, Xhignesse M, Lussier-Cacan S, Roy M. Family history and the risk of coronary heart disease: comparing predictive models. *European Journal of Epidemiology*. 2001;17:609-620.
63. Jee SH, Park JW, Lee SY, Nam BH, Ryu HG, Kim SY, Kim YN, Lee JK, Choi SM, Yun JE. Stroke risk prediction model: a risk profile from the Korean study. *Atherosclerosis*. 2008;197:318-325.
64. Assmann G, Schulte H, Cullen P, Seedorf U. Assessing risk of myocardial infarction and stroke: new data from the Prospective Cardiovascular Munster (PROCAM) study. *European Journal of Clinical Investigation*. 2007;37:925-932.

65. Yang X, Ma RC, So WY, Kong AP, Ko GT, Ho CS, Lam CW, Cockram CS, Tong PC, Chan JC. Development and validation of a risk score for hospitalization for heart failure in patients with Type 2 diabetes mellitus. *Cardiovascular Diabetology*. 2008;7:9.
66. Schnabel RB, Sullivan LM, Levy D, Pencina MJ, Massaro JM, D'Agostino RB Sr, Newton-Cheh C, Yamamoto JF, Magnani JW, Tadros TM, Kannel WB, Wang TJ, Ellinor PT, Wolf PA, Vasan RS, Benjamin EJ. Development of a risk score for atrial fibrillation (Framingham Heart Study): a community-based cohort study. *Lancet*. 2009;373:739-745.
67. Kjeldsen SE, Devereux RB, Hille DA, Lyle PA, Dahlof B, Julius S, Edelman JM, Snapinn SM, de Faire U, Fyhrquist F, Ibsen H, Lederballe-Pedersen O, Lindholm LH, Nieminen MS, Omvik P, Oparil S, Wedel H. Predictors of cardiovascular events in patients with hypertension and left ventricular hypertrophy: the Losartan Intervention for Endpoint reduction in hypertension study. *Blood Pressure*. 2009;18:348-361.
68. Wu Y, Zhang L, Yuan X, Wu Y, Yi D. Quantifying links between stroke and risk factors: a study on individual health risk appraisal of stroke in a community of Chongqing. *Neurological Sciences: Official Journal of the Italian Neurological Society and of the Italian Society of Clinical Neurophysiology*. 2011;32:211-219.
69. Chien KL, Su TC, Hsu HC, Chang WT, Chen PC, Sung FC, Chen MF, Lee YT. Constructing the prediction model for the risk of stroke in a Chinese population: report from a cohort study in Taiwan. *Stroke*. 2010;41:1858-1864.
70. Ramos R, Baena-Diez JM, Quesada M, Solanas P, Subirana I, Sala J, Alzamora M, Fores R, Masia R, Elosua R, Grau M, Cordon F, Pera G, Rigo F, Marti R, Ponjoan A, Cerezo C, Brugada R, Marrugat J. Derivation and validation of REASON: a risk score identifying candidates to screen for peripheral arterial disease using ankle brachial index. *Atherosclerosis*. 2011;214:474-479.
71. McGorrian C, Yusuf S, Islam S, Jung H, Rangarajan S, Avezum A, Prabhakaran D, Almahmeed W, Rumboldt Z, Budaj A, Dans AL, Gerstein HC, Teo K, Anand SS, Interheart Investigators. Estimating modifiable coronary heart disease risk in multiple regions of the world: the INTERHEART Modifiable Risk Score. *European Heart Journal*. 2011;32:581-589.
72. Stevens RJ, Kothari V, Adler AI, Stratton IM, United Kingdom Prospective Diabetes Study G. The UKPDS risk engine: a model for the risk of coronary heart disease in Type II diabetes (UKPDS 56). *Clinical Science*. 2001;101:671-679.
73. Folsom AR, Chambless LE, Duncan BB, Gilbert AC, Pankow JS, Atherosclerosis Risk in Communities Study I. Prediction of coronary heart disease in middle-aged adults with diabetes. *Diabetes Care*. 2003;26:2777-2784.
74. Liu J, Hong Y, D'Agostino RB, Sr., Wu Z, Wang W, Sun J, Wilson PW, Kannel WB, Zhao D. Predictive value for the Chinese population of the Framingham CHD risk assessment tool compared with the Chinese Multi-Provincial Cohort Study. *JAMA*. 2004;291:2591-2599.
75. Donnan PT, Donnelly L, New JP, Morris AD. Derivation and validation of a prediction score for major coronary heart disease events in a U.K. type 2 diabetic population. *Diabetes Care*. 2006;29:1231-1236.
76. Woodward M, Brindle P, Tunstall-Pedoe H, SIGN Group on Risk Estimation. Adding social deprivation and family history to cardiovascular risk assessment: the ASSIGN score from the Scottish Heart Health Extended Cohort (SHHEC). *Heart*. 2007;93:172-176.
77. Mainous AG, 3rd, Koopman RJ, Diaz VA, Everett CJ, Wilson PW, Tilley BC. A coronary heart disease risk score based on patient-reported information. *American Journal of Cardiology*. 2007;99:1236-1241.

78. Hippisley-Cox J, Coupland C, Vinogradova Y, Robson J, May M, Brindle P. Derivation and validation of QRISK, a new cardiovascular disease risk score for the United Kingdom: prospective open cohort study. *BMJ*. 2007;335:136.
79. D'Agostino RB, Sr., Vasan RS, Pencina MJ, Wolf PA, Cobain M, Massaro JM, Kannel WB. General cardiovascular risk profile for use in primary care: the Framingham Heart Study. *Circulation*. 2008;117:743-753.
80. Cederholm J, Eeg-Olofsson K, Eliasson B, Zethelius B, Nilsson PM, Gudbjornsdottir S. Risk prediction of cardiovascular disease in type 2 diabetes: a risk equation from the Swedish National Diabetes Register. *Diabetes Care*. 2008;31:2038-2043.
81. Wilson PW, Bozeman SR, Burton TM, Hoaglin DC, Ben-Joseph R, Pashos CL. Prediction of first events of coronary heart disease and stroke with consideration of adiposity. *Circulation*. 2008;118:124-130.
82. Teramoto T, Ohashi Y, Nakaya N, Yokoyama S, Mizuno K, Nakamura H, MEGA Study Group. Practical risk prediction tools for coronary heart disease in mild to moderate hypercholesterolemia in Japan: originated from the MEGA study data. *Circulation Journal: Official Journal of the Japanese Circulation Society*. 2008;72:1569-1575.
83. Maracy MR, Hosseini SM, Amini M. Risk scores in ischaemic heart disease patients with type 2 diabetes, Isfahan, Iran. *Acta Cardiologica*. 2008;63:729-734.
84. Arima H, Yonemoto K, Doi Y, Ninomiya T, Hata J, Tanizaki Y, Fukuhara M, Matsumura K, Iida M, Kiyohara Y. Development and validation of a cardiovascular risk prediction model for Japanese: the Hisayama study. *Hypertension Research: Official Journal of the Japanese Society of Hypertension*. 2009;32:1119-1122.
85. Sacco RL, Khatri M, Rundek T, Xu Q, Gardener H, Boden-Albala B, Di Tullio MR, Homma S, Elkind MS, Paik MC. Improving global vascular risk prediction with behavioral and anthropometric factors. The multiethnic NOMAS (Northern Manhattan Cohort Study). *Journal of the American College of Cardiology*. 2009;54:2303-2311.
86. Zgibor JC, Ruppert K, Orchard TJ, Soedamah-Muthu SS, Fuller J, Chaturvedi N, Roberts MS. Development of a coronary heart disease risk prediction model for type 1 diabetes: the Pittsburgh CHD in Type 1 Diabetes Risk Model. *Diabetes Research and Clinical Practice*. 2010;88:314-321.
87. Zethelius B, Eliasson B, Eeg-Olofsson K, Svensson AM, Gudbjornsdottir S, Cederholm J. A new model for 5-year risk of cardiovascular disease in type 2 diabetes, from the Swedish National Diabetes Register (NDR). *Diabetes Research and Clinical Practice*. 2011;93:276-284.
88. Kang GD, Guo L, Guo ZR, Hu XS, Wu M, Yang HT. Continuous metabolic syndrome risk score for predicting cardiovascular disease in the Chinese population. *Asia Pacific Journal of Clinical Nutrition*. 2012;21:88-96.
89. Tu JV, Jaglal SB, Naylor CD. Multicenter validation of a risk index for mortality, intensive care unit stay, and overall hospital length of stay after cardiac surgery. Steering Committee of the Provincial Adult Cardiac Care Network of Ontario. *Circulation*. 1995;91:677-684.
90. Nashef SA, Roques F, Michel P, Gauducheau E, Lemeshow S, Salamon R. European system for cardiac operative risk evaluation (EuroSCORE). *European Journal of Cardio-thoracic Surgery: Official Journal of the European Association for Cardio-thoracic Surgery*. 1999;16:9-13.
91. Bernstein AD, Parsonnet V. Bedside estimation of risk as an aid for decision-making in cardiac surgery. *Annals of Thoracic Surgery*. 2000;69:823-828.

92. Huijskes RV, Rosseel PM, Tijssen JG. Outcome prediction in coronary artery bypass grafting and valve surgery in the Netherlands: development of the Amphiascore and its comparison with the Euroscore. *European Journal of Cardio-thoracic Surgery: Official Journal of the European Association for Cardio-thoracic Surgery*. 2003;24:741-749.
93. Nowicki ER, Birkmeyer NJ, Weintraub RW, Leavitt BJ, Sanders JH, Dacey LJ, Clough RA, Quinn RD, Charlesworth DC, Sisto DA, Uhlig PN, Olmstead EM, O'Connor GT, Northern New England Cardiovascular Disease Study Group. Multivariable prediction of in-hospital mortality associated with aortic and mitral valve surgery in Northern New England. *Annals of Thoracic Surgery*. 2004;77:1966-1977.
94. Ambler G, Omar RZ, Royston P, Kinsman R, Keogh BE, Taylor KM. Generic, simple risk stratification model for heart valve surgery. *Circulation*. 2005;112:224-231.
95. Jin R, Grunkemeier GL, Starr A, Providence Health System Cardiovascular Study G. Validation and refinement of mortality risk models for heart valve surgery. *Annals of Thoracic Surgery*. 2005;80:471-479.
96. Hannan EL, Wu C, Bennett EV, Carlson RE, Culliford AT, Gold JP, Higgins RS, Smith CR, Jones RH. Risk index for predicting in-hospital mortality for cardiac valve surgery. *Annals of Thoracic Surgery*. 2007;83:921-929.
97. Nissinen J, Biancari F, Wistbacka JO, Lopenen P, Teittinen K, Tarkiainen P, Koivisto SP, Tarkka M. Is it possible to improve the accuracy of EuroSCORE? *European Journal of Cardio-thoracic Surgery: Official Journal of the European Association for Cardio-thoracic Surgery*. 2009;36:799-804.
98. O'Brien SM, Shahian DM, Filardo G, Ferraris VA, Haan CK, Rich JB, Normand SL, DeLong ER, Shewan CM, Dokholyan RS, Peterson ED, Edwards FH, Anderson RP, Society of Thoracic Surgeons Quality Measurement TAsk Force. The Society of Thoracic Surgeons 2008 cardiac surgery risk models: part 2--isolated valve surgery. *Annals of Thoracic Surgery*. 2009;88:S23-42.
99. Hankey GJ, Slattery JM, Warlow CP. Transient ischaemic attacks: which patients are at high (and low) risk of serious vascular events? *Journal of Neurology, Neurosurgery, and Psychiatry*. 1992;55:640-652.
100. Lisk DR, Pasteur W, Rhoades H, Putnam RD, Grotta JC. Early presentation of hemispheric intracerebral hemorrhage: prediction of outcome and guidelines for treatment allocation. *Neurology*. 1994;44:133-139.
101. Rothwell PM, Warlow CP. Prediction of benefit from carotid endarterectomy in individual patients: a risk-modelling study. European Carotid Surgery Trialists' Collaborative Group. *Lancet*. 1999;353:2105-2110.
102. Kent DM, Selker HP, Ruthazer R, Bluhmki E, Hacke W. The stroke-thrombolytic predictive instrument: a predictive instrument for intravenous thrombolysis in acute ischemic stroke. *Stroke*. 2006;37:2957-2962.
103. Koopman K, Uyttenboogaart M, Vroomen PC, van der Meer J, De Keyser J, Luijckx GJ. Development and validation of a predictive outcome score of cerebral venous thrombosis. *Journal of the Neurological Sciences*. 2009;276:66-68.
104. Ferro JM, Bacelar-Nicolau H, Rodrigues T, Bacelar-Nicolau L, Canhao P, Crassard I, Bousser MG, Dutra AP, Massaro A, Mackowiack-Cordioli MA, Leys D, Fontes J, Stam J, Barinagarrementeria F. Risk score to predict the outcome of patients with cerebral vein and dural sinus thrombosis. *Cerebrovascular Diseases*. 2009;28:39-44.

105. Arboix A, Garcia-Eroles L, Massons J, Oliveres M. Predictive clinical factors of in-hospital mortality in 231 consecutive patients with cardioembolic cerebral infarction. *Cerebrovascular Diseases*. 1998;8:8-13.
106. Roquer J, Ois A, Rodriguez Campello A, Gomis M, Munteis E, Jimenez Conde J, Martinez-Rodriguez JE. Clustering of vascular risk factors and in-hospital death after acute ischemic stroke. *Journal of Neurology*. 2007;254:1636-1641.
107. Saposnik G, Kapral MK, Liu Y, Hall R, O'Donnell M, Raptis S, Tu JV, Mamdani M, Austin PC, Investigators of the Registry of the Canadian Stroke Network, Stroke Outcomes Research Canada Working Group. IScore: a risk score to predict death early after hospitalization for an acute ischemic stroke. *Circulation*. 2011;123:739-749.
108. Kuijjer PM, Hutten BA, Prins MH, Buller HR. Prediction of the risk of bleeding during anticoagulant treatment for venous thromboembolism. *Archives of Internal Medicine*. 1999;159:457-460.
109. Kahn SR, Joseph L, Abenhaim L, Leclerc JR. Clinical prediction of deep vein thrombosis in patients with leg symptoms. *Thrombosis and Haemostasis*. 1999;81:353-357.
110. Miniati M, Monti S, Bottai M. A structured clinical model for predicting the probability of pulmonary embolism. *American Journal of Medicine*. 2003;114:173-179.
111. Constans J, Boutinet C, Salmi LR, Saby JC, Nelzy ML, Baudouin P, Sampoux F, Marchand JM, Boutami C, Dehant V, Pulci S, Gauthier JP, Cacareigt-Bourdenx V, Barcat D, Conri C. Comparison of four clinical prediction scores for the diagnosis of lower limb deep venous thrombosis in outpatients. *American Journal of Medicine*. 2003;115:436-440.
112. Chen JY, Chao TH, Guo YL, Hsu CH, Huang YY, Chen JH, Lin LJ. A simplified clinical model to predict pulmonary embolism in patients with acute dyspnea. *International Heart Journal*. 2006;47:259-271.
113. Miniati M, Bottai M, Monti S, Salvadori M, Serasini L, Passera M. Simple and accurate prediction of the clinical probability of pulmonary embolism. *American Journal of Respiratory and Critical Care Medicine*. 2008;178:290-294.
114. Urbonavicius S, Vorum H, Urbonaviciene G, Trumpickas M, Pavalkis D, Honore B. Predictors of post-operative mortality following treatment for non-ruptured abdominal aortic aneurysm. *Current Controlled Trials in Cardiovascular Medicine*. 2005;6:14.
115. Giles KA, Schermerhorn ML, O'Malley AJ, Cotterill P, Jhaveri A, Pomposelli FB, Landon BE. Risk prediction for perioperative mortality of endovascular vs open repair of abdominal aortic aneurysms using the Medicare population. *Journal of Vascular Surgery*. 2009;50:256-262.
116. Egorova N, Giacobelli JK, Gelijns A, Greco G, Moskowitz A, McKinsey J, Kent KC. Defining high-risk patients for endovascular aneurysm repair. *Journal of Vascular Surgery*. 2009;50:1271-1279.
117. Grant SW, Grayson AD, Purkayastha D, Wilson SD, McCollum C, Participants in the Vascular Governance North West P. Logistic risk model for mortality following elective abdominal aortic aneurysm repair. *British Journal of Surgery*. 2011;98:652-658.
118. Knuiman MW, Vu HT. Prediction of coronary heart disease mortality in Busselton, Western Australia: an evaluation of the Framingham, national health epidemiologic follow up study, and WHO ERICA risk scores. *Journal of Epidemiology and Community Health*. 1997;51:515-519.
119. Kornitzer M, Koyunco R. Multifactorial approach to the prevention of coronary heart disease: from computer to paper and pencil? *Journal of Cardiovascular Risk*. 2000;7:201-207.



120. Pocock SJ, McCormack V, Gueyffier F, Boutitie F, Fagard RH, Boissel JP. A score for predicting risk of death from cardiovascular disease in adults with raised blood pressure, based on individual patient data from randomised controlled trials. *BMJ*. 2001;323:75-81.
121. Conroy RM, Pyorala K, Fitzgerald AP, Sans S, Menotti A, De Backer G, De Bacquer D, Ducimetiere P, Jousilahti P, Keil U, Njolstad I, Oganov RG, Thomsen T, Tunstall-Pedoe H, Tverdal A, Wedel H, Whincup P, Wilhelmsen L, Graham IM, SCORE Project Group. Estimation of ten-year risk of fatal cardiovascular disease in Europe: the SCORE project. *European Heart Journal*. 2003;24:987-1003.
122. Balkau B, Hu G, Qiao Q, Tuomilehto J, Borch-Johnsen K, Pyorala K, DECODE Study Group, European Diabetes Epidemiology Group. Prediction of the risk of cardiovascular mortality using a score that includes glucose as a risk factor. The DECODE Study. *Diabetologia*. 2004;47:2118-2128.
123. Porock D, Oliver DP, Zweig S, Rantz M, Mehr D, Madsen R, Petroski G. Predicting death in the nursing home: development and validation of the 6-month Minimum Data Set mortality risk index. *Journals of Gerontology Series A, Biological Sciences and Medical Sciences*. 2005;60:491-498.
124. Cabin HS, Clubb KS, Hall C, Perlmutter RA, Feinstein AR. Risk for systemic embolization of atrial fibrillation without mitral stenosis. *American Journal of Cardiology*. 1990;65:1112-1116.
125. Hart RG, Pearce LA, McBride R, Rothbart RM, Asinger RW. Factors associated with ischemic stroke during aspirin therapy in atrial fibrillation: analysis of 2012 participants in the SPAF I-III clinical trials. The Stroke Prevention in Atrial Fibrillation (SPAF) Investigators. *Stroke*. 1999;30:1223-1229.
126. Wang TJ, Massaro JM, Levy D, Vasan RS, Wolf PA, D'Agostino RB, Larson MG, Kannel WB, Benjamin EJ. A risk score for predicting stroke or death in individuals with new-onset atrial fibrillation in the community: the Framingham Heart Study. *JAMA*. 2003;290:1049-1056.
127. Shireman TI, Mahnken JD, Howard PA, Kresowik TF, Hou Q, Ellerbeck EF. Development of a contemporary bleeding risk model for elderly warfarin recipients. *Chest*. 2006;130:1390-1396.
128. Lip GY, Nieuwlaat R, Pisters R, Lane DA, Crijns HJ. Refining clinical risk stratification for predicting stroke and thromboembolism in atrial fibrillation using a novel risk factor-based approach: the euro heart survey on atrial fibrillation. *Chest*. 2010;137:263-272.
129. Mathews R, Peterson ED, Chen AY, Wang TY, Chin CT, Fonarow GC, Cannon CP, Rumsfeld JS, Roe MT, Alexander KP. In-hospital major bleeding during ST-elevation and non-ST-elevation myocardial infarction care: derivation and validation of a model from the ACTION Registry(R)-GWTG. *American Journal of Cardiology*. 2011;107:1136-1143.
130. Tuman KJ, McCarthy RJ, March RJ, Najafi H, Ivankovich AD. Morbidity and duration of ICU stay after cardiac surgery. A model for preoperative risk assessment. *Chest*. 1992;102:36-44.
131. Lim E, Ali ZA, Barlow CW, Jackson CH, Hosseinpour AR, Halstead JC, Barlow JB, Wells FC. A simple model to predict coronary disease in patients undergoing operation for mitral regurgitation. *Annals of Thoracic Surgery*. 2003;75:1820-1825.
132. Selker HP, Griffith JL, D'Agostino RB. A tool for judging coronary care unit admission appropriateness, valid for both real-time and retrospective use. A time-insensitive predictive instrument (TIPI) for acute cardiac ischemia: a multicenter study. *Medical Care*. 1991;29:610-627.
133. Ngako A, Santin A, Hemery F, Salloum M, Calmettes MJ, Herve J, Grego JC, Roupie E, Maison P, Renaud B. Prediction of myocardial infarction risk in older patients with acute coronary syndrome. *American Journal of Emergency Medicine*. 2009;27:675-682.

134. Gencer B, Vaucher P, Herzig L, Verdon F, Ruffieux C, Bosner S, Burnand B, Bischoff T, Donner-Banzhoff N, Favrat B. Ruling out coronary heart disease in primary care patients with chest pain: a clinical prediction score. *BMC Medicine*. 2010;8:9.
135. Bosner S, Haasenritter J, Becker A, Karatolios K, Vaucher P, Gencer B, Herzig L, Heinzl-Gutenbrunner M, Schaefer JR, Abu Hani M, Keller H, Sonnichsen AC, Baum E, Donner-Banzhoff N. Ruling out coronary artery disease in primary care: development and validation of a simple prediction rule. *CMAJ: Canadian Medical Association Journal*. 2010;182:1295-1300.
136. Anyanwu AC, Rogers CA, Murday AJ. A simple approach to risk stratification in adult heart transplantation. *European Journal of Cardio-thoracic Surgery: Official Journal of the European Association for Cardio-thoracic Surgery*. 1999;16:424-428.
137. Haines DE, Wang Y, Curtis J. Implantable cardioverter-defibrillator registry risk score models for acute procedural complications or death after implantable cardioverter-defibrillator implantation. *Circulation*. 2011;123:2069-2076.
138. Bouleti C, lung B, Laouenan C, Himbert D, Brochet E, Messika-Zeitoun D, Detaint D, Garbarz E, Cormier B, Michel PL, Mentre F, Vahanian A. Late results of percutaneous mitral commissurotomy up to 20 years: development and validation of a risk score predicting late functional results from a series of 912 patients. *Circulation*. 2012;125:2119-2127.
139. Holme I, Pedersen TR, Boman K, Egstrup K, Gerds E, Kesaniemi YA, Malbecq W, Ray S, Rossebø AB, Wachtell K, Willenheimer R, Gohlke-Barwolf C. A risk score for predicting mortality in patients with asymptomatic mild to moderate aortic stenosis. *Heart*. 2012;98:377-383.
140. Weiss ES, Allen JG, Arnaoutakis GJ, George TJ, Russell SD, Shah AS, Conte JV. Creation of a quantitative recipient risk index for mortality prediction after cardiac transplantation (IMPACT). *Annals of Thoracic Surgery*. 2011;92:914-921.
141. Passman RS, Gingold DS, Amar D, Lloyd-Jones D, Bennett CL, Zhang H, Rusch VW. Prediction rule for atrial fibrillation after major noncardiac thoracic surgery. *Annals of Thoracic Surgery*. 2005;79:1698-1703.
142. Rogers SO, Jr., Kilaru RK, Hosokawa P, Henderson WG, Zinner MJ, Khuri SF. Multivariable predictors of postoperative venous thromboembolic events after general and vascular surgery: results from the patient safety in surgery study. *Journal of the American College of Surgeons*. 2007;204:1211-1221.
143. Decousus H, Tapson VF, Bergmann JF, Chong BH, Froehlich JB, Kakkar AK, Merli GJ, Monreal M, Nakamura M, Pavanello R, Pini M, Piovella F, Spencer FA, Spyropoulos AC, Turpie AG, Zotz RB, Fitzgerald G, Anderson FA, IMPROVE Investigators. Factors at admission associated with bleeding risk in medical patients: findings from the IMPROVE investigators. *Chest*. 2011;139:69-79.
144. Cook A, Osler T, Gaudet M, Berne J, Norwood S. Blunt cerebrovascular injury is poorly predicted by modeling with other injuries: analysis of NTDB data. *Journal of Trauma*. 2011;71:114-119.
145. Rohrig R, Junger A, Hartmann B, Klasen J, Quinzio L, Jost A, Benson M, Hempelmann G. The incidence and prediction of automatically detected intraoperative cardiovascular events in noncardiac surgery. *Anesthesia and Analgesia*. 2004;98:569-577.
146. Davenport DL, Ferraris VA, Hosokawa P, Henderson WG, Khuri SF, Mentzer RM, Jr. Multivariable predictors of postoperative cardiac adverse events after general and vascular surgery: results from the patient safety in surgery study. *Journal of the American College of Surgeons*. 2007;204:1199-1210.

147. Verheugt CL, Uiterwaal CS, van der Velde ET, Meijboom FJ, Pieper PG, Veen G, Stappers JL, Grobbee DE, Mulder BJ. Turning 18 with congenital heart disease: prediction of infective endocarditis based on a large population. *European Heart Journal*. 2011;32:1926-1934.
148. Calvillo-King L, Xuan L, Zhang S, Tuhim S, Halm EA. Predicting risk of perioperative death and stroke after carotid endarterectomy in asymptomatic patients: derivation and validation of a clinical risk score. *Stroke*. 2010;41:2786-2794.
149. Barrett TW, Martin AR, Storrow AB, Jenkins CA, Harrell FE Jr, Russ S, Roden DM, Darbar D. A clinical prediction model to estimate risk for 30-day adverse events in emergency department patients with symptomatic atrial fibrillation. *Annals of Emergency Medicine*. 2011;57:1-12.
150. Eichinger S, Heinze G, Jandeck LM, Kyrle PA. Risk assessment of recurrence in patients with unprovoked deep vein thrombosis or pulmonary embolism: the Vienna prediction model. *Circulation*. 2010;121:1630-1636.
151. Yamaki T, Nozaki M, Sakurai H, Takeuchi M, Soejima K, Kono T. Presence of lower limb deep vein thrombosis and prognosis in patients with symptomatic pulmonary embolism: preliminary report. *European Journal of Vascular and Endovascular Surgery: The Official Journal of the European Society for Vascular Surgery*. 2009;37:225-231.
152. Sun BC, Derose SF, Liang LJ, Gabayan GZ, Hoffman JR, Moore AA, Mower WR, Mangione CM. Predictors of 30-day serious events in older patients with syncope. *Annals of Emergency Medicine*. 2009;54:769-778.
153. Cruz-Gonzalez I, Sanchez-Ledesma M, Sanchez PL, Martin-Moreiras J, Jneid H, Rengifo-Moreno P, Inglessis-Azuaje I, Maree AO, Palacios IF. Predicting success and long-term outcomes of percutaneous mitral valvuloplasty: a multifactorial score. *American Journal of Medicine*. 2009;122:581.
154. Monin JL, Lancellotti P, Monchi M, Lim P, Weiss E, Pierard L, Gueret P. Risk score for predicting outcome in patients with asymptomatic aortic stenosis. *Circulation*. 2009;120:69-75.
155. Nishiuchi T, Hayashino Y, Fukuhara S, Iwami T, Hayashi Y, Hiraide A, Ikeuchi H, Yukioka H, Matsuoka T. Survival rate and factors associated with 1-month survival of witnessed out-of-hospital cardiac arrest of cardiac origin with ventricular fibrillation and pulseless ventricular tachycardia: the Utstein Osaka project. *Resuscitation*. 2008;78:307-313.
156. Kim H, Lee JH, Choi SJ, Lee JH, Seol M, Lee YS, Kim WK, Lee JS, Lee KH. Risk score model for fatal intracranial hemorrhage in acute leukemia. *Leukemia*. 2006;20:770-776.
157. Ivanov J, Borger MA, Rao V, David TE. The Toronto Risk Score for adverse events following cardiac surgery. *Canadian Journal of Cardiology*. 2006;22:221-227.
158. Yuan BC, Tzeng HM. Developing a predictive model for vertigo using demographic and laboratory data: An evidence-based medicine approach. *Acta Oto-laryngologica*. 2006;126:20-24.
159. Aujesky D, Obrosky DS, Stone RA, Auble TE, Perrier A, Cornuz J, Roy PM, Fine MJ. Derivation and validation of a prognostic model for pulmonary embolism. *American Journal of Respiratory and Critical Care Medicine*. 2005;172:1041-1046.
160. Karlson BW, Herlitz J, Strombom U, Lindqvist J, Oden A, Hjalmarson A. Improvement of ED prediction of cardiac mortality among patients with symptoms suggestive of acute myocardial infarction. *American Journal of Emergency Medicine*. 1997;15:1-7.

161. McDonald MA, Holroyd B, Comeau A, Hervas-Malo M, Welsh RC. Clinical risk scoring beyond initial troponin values: results from a large, prospective, unselected acute chest pain population. *Canadian Journal of Cardiology*. 2007;23:287-292.
